# Supplementary material for: Combining Genetic and Transcriptomic Approaches to Identify Transporter-Coding Genes as Likely Responsible for a Repeatable Salt Tolerance QTL in Citrus
Source: MDPI journal article supplement (doi:10.3390/ijms242115759), 2023-10-30
Supplement: s1 [file s1]

Article

# Combining Genetic and Transcriptomic Approaches to Identify Transporter-Coding Genes as Likely Responsible for a Repeatable Salt Tolerance QTL in Citrus

**Figure S1.** General views of the GP experiment (A, 2014; B, 2013) at the Valencia facility and the NG experiment (C, 2020) at the Malaga facility, both in Spain.

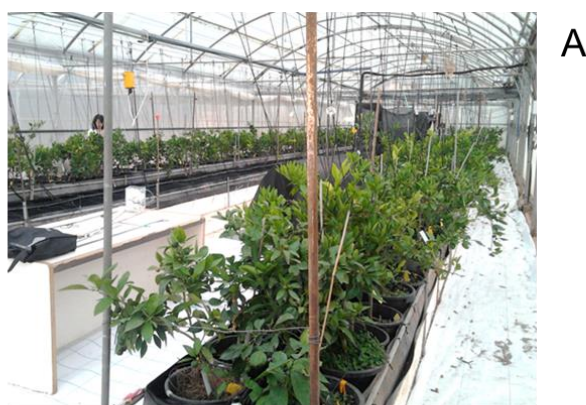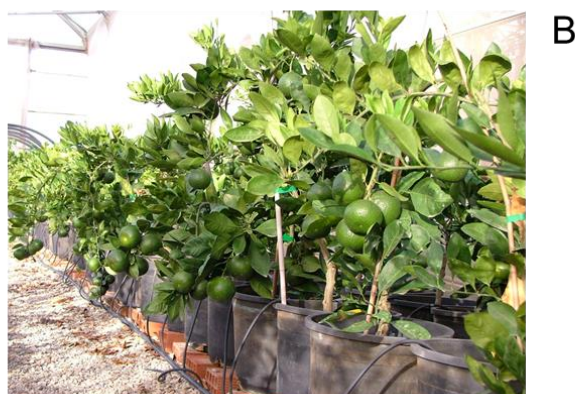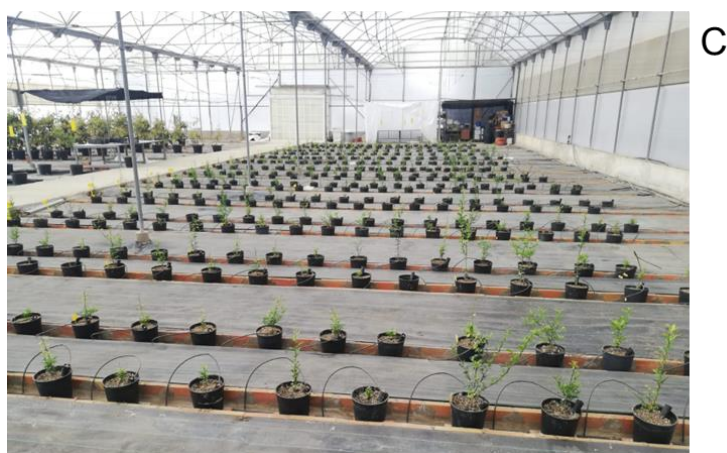

**Figure S2.** Distributions of relevant traits evaluated in GP experiment under control (green) and salinity (red) conditions. The means of the parents (Cleopatra and Flying Dragon) and the reference rootstock Carrizo are indicated by black, red and blue vertical lines, respectively. Discontinuous lines correspond to control means.

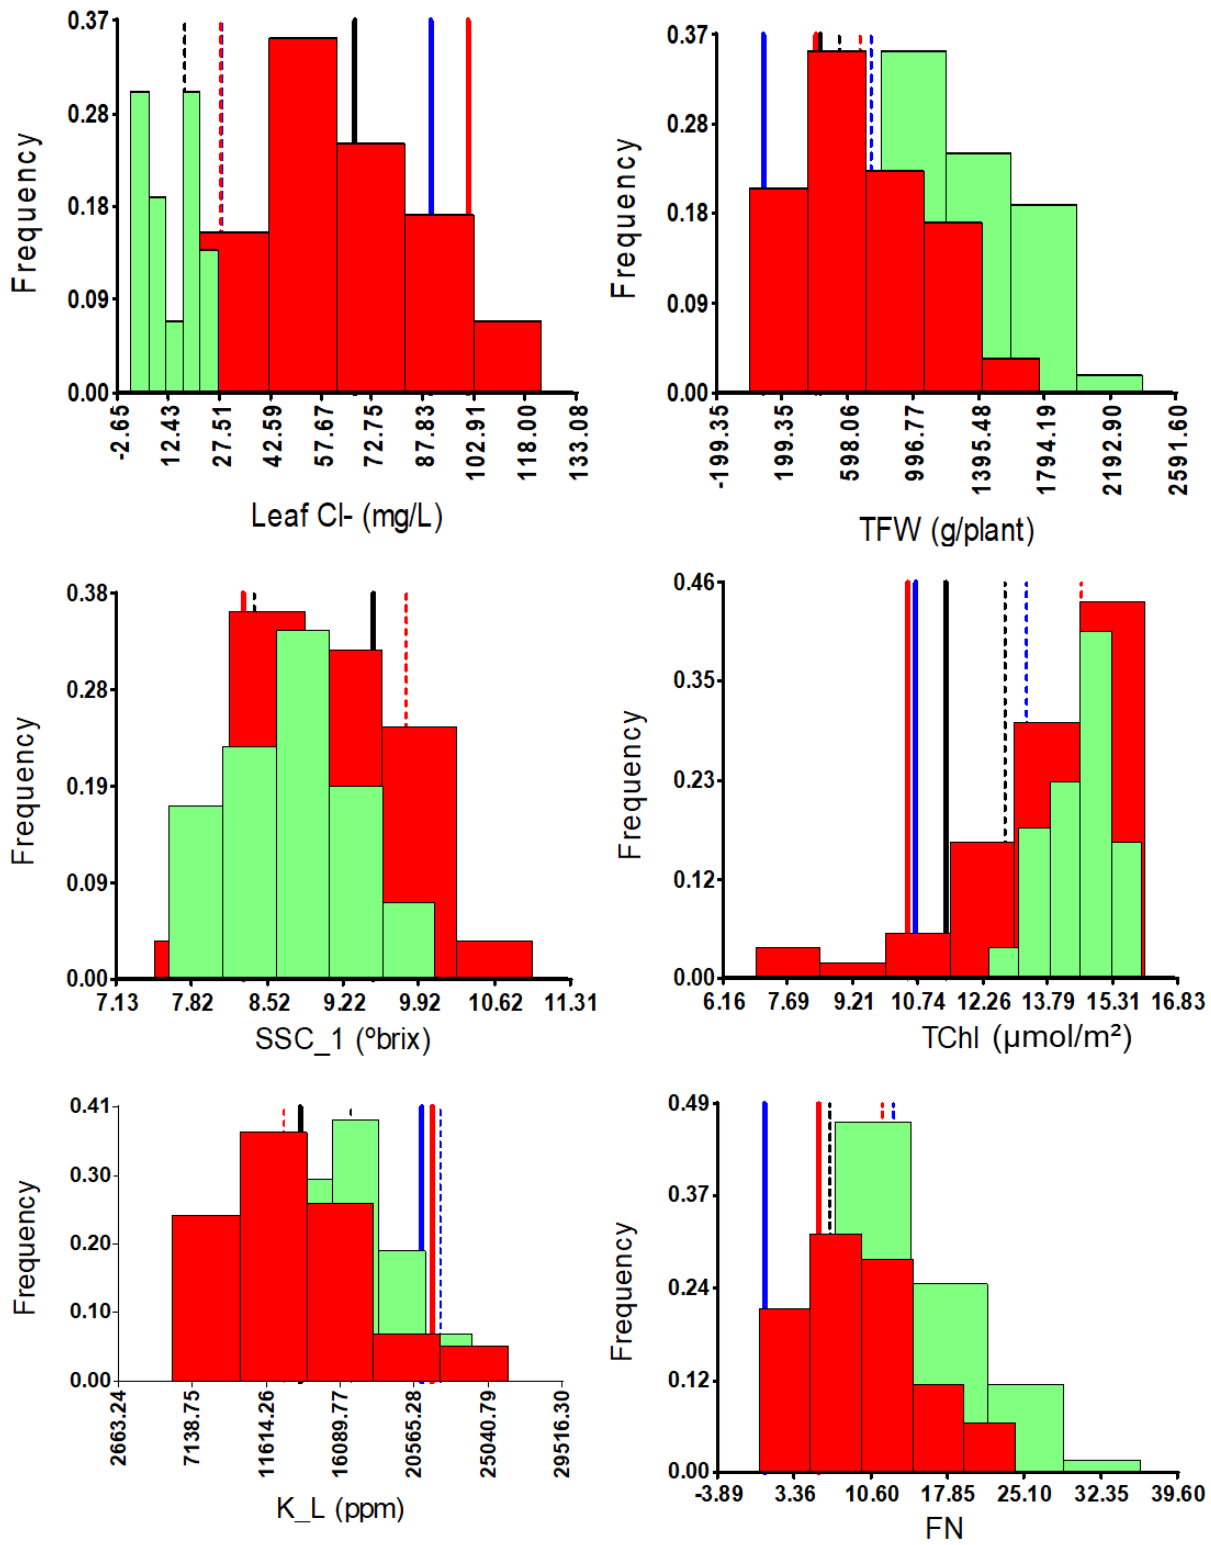

**Figure S3.** A: LOD profiles of QTLs in linkage group 4c (*C. clementina* scaffold 6), including one involved in rootstock-mediated tolerance to salinity (Cl\_L\_S) in GP experiment (Cl\*\_S corresponds to the salt tolerance QTL reported by Raga *et al.*, 2016). Genetic positions (markers) along the integrated *Citrus-Poncirus* linkage group 4c are shown under the X axis. Linkage group- and genome-wide LOD critical values are indicated by a thin and a thick horizontal red line, respectively. B: Genotypic means at significant marker CR23,750.

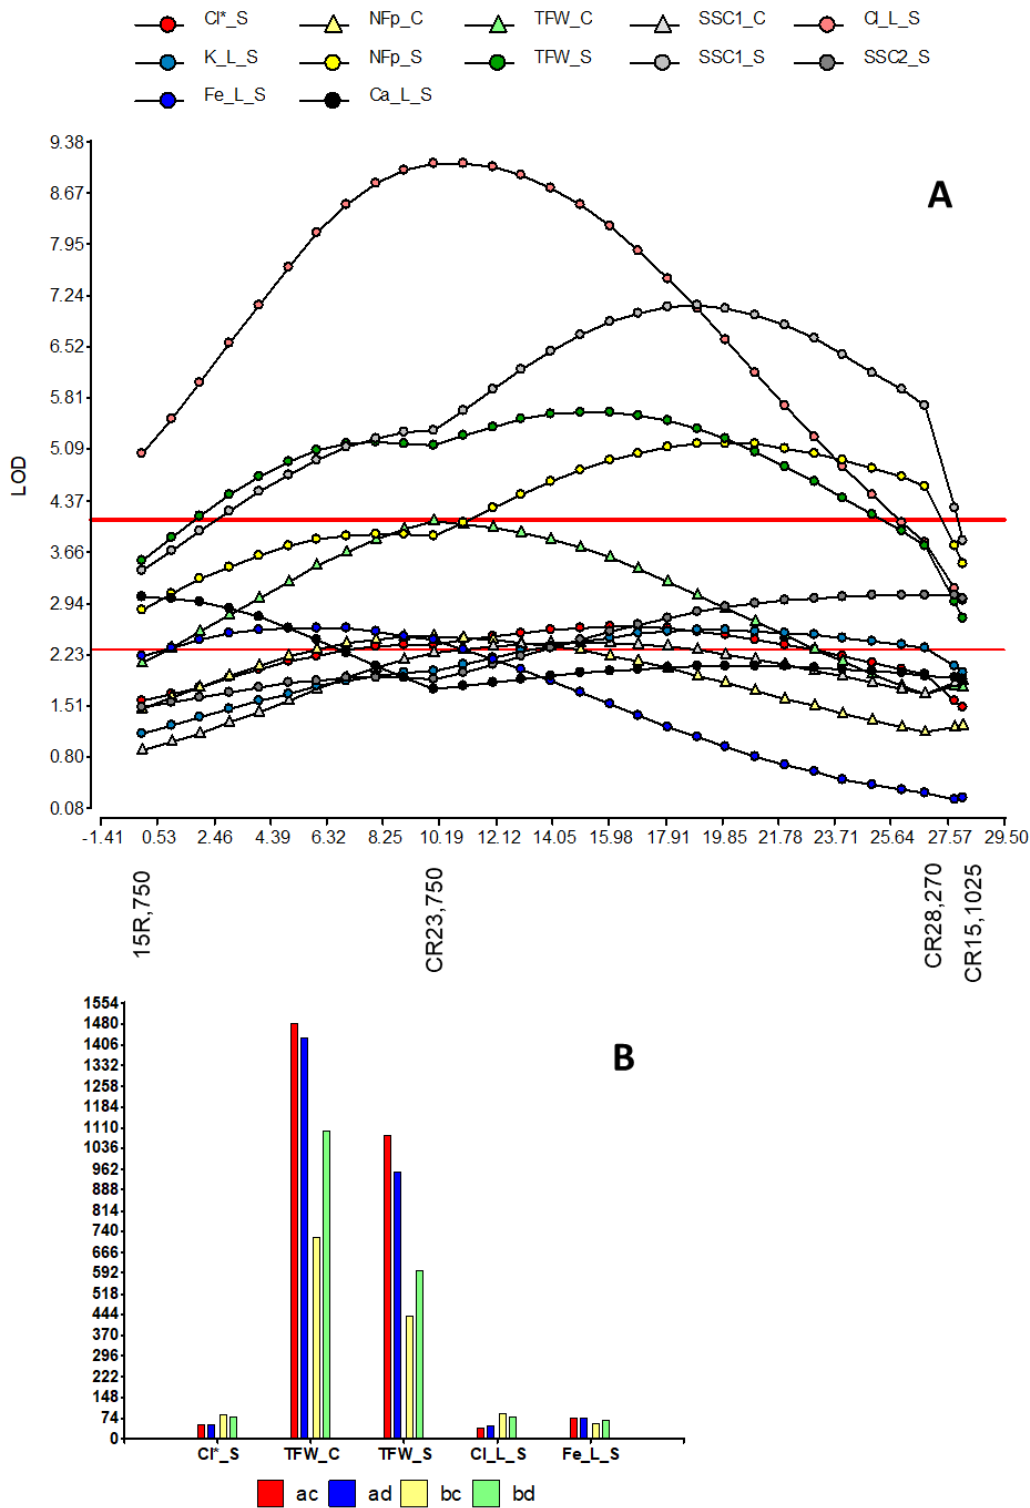

**Figure S4.** Distributions of traits related to leaf and root [Cl<sup>-</sup>] in the NG experiment, under control conditions, in green, and, under salinity conditions, in red: (A) leaf [Cl<sup>-</sup>], (B) root [Cl<sup>-</sup>], and (C) their difference relative to root [Cl<sup>-</sup>]; the means of the parents (Cleopatra, in black; Rich, in red) are indicated by vertical lines. Discontinuous lines correspond to control means.

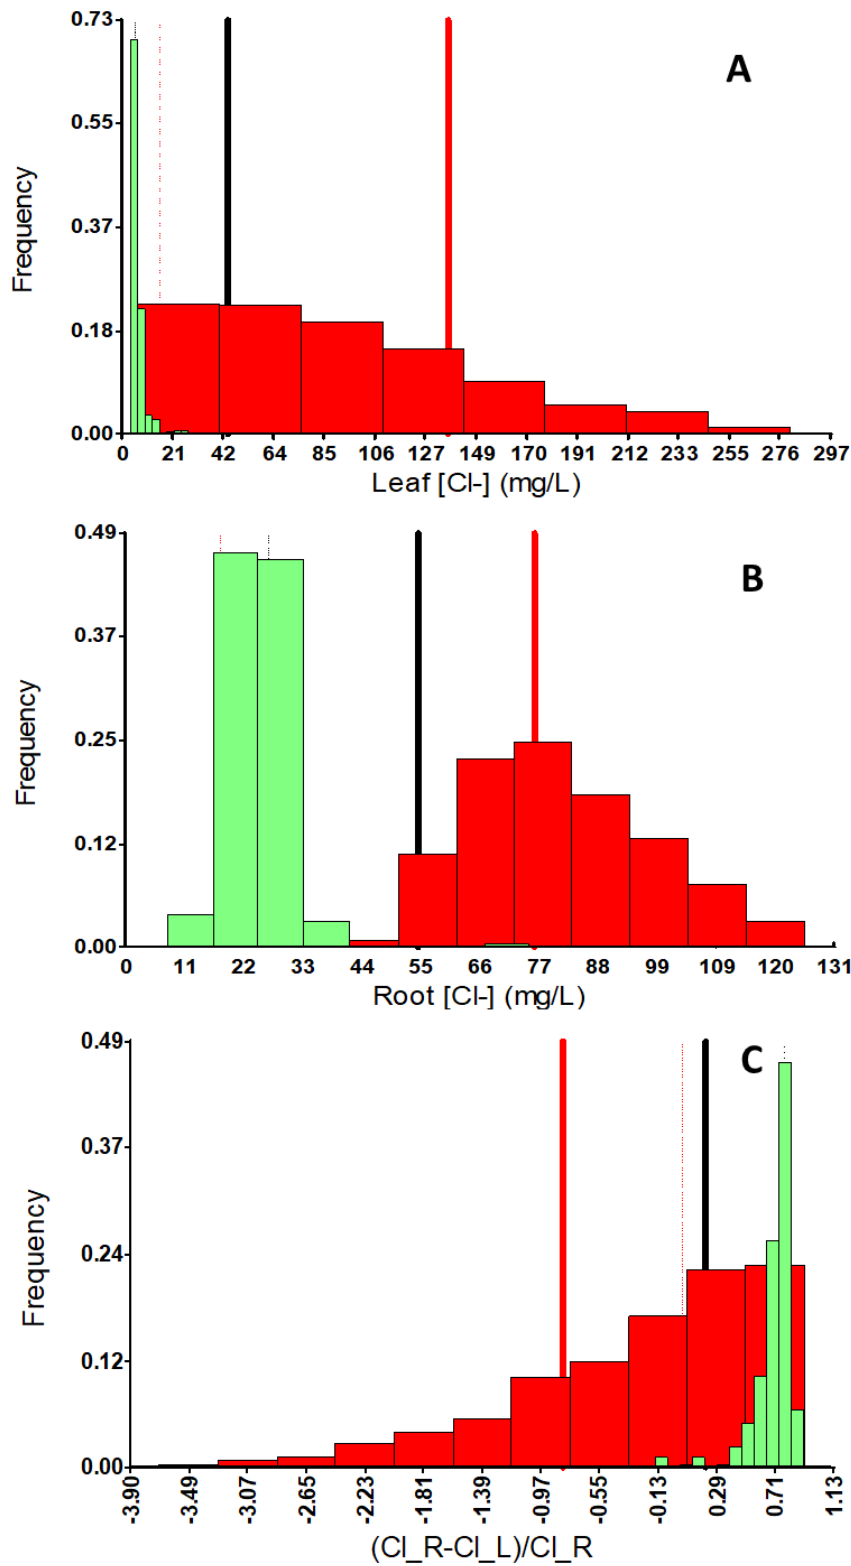

**Figure S5.** Reaction norm plots of hybrids and parents (salinity responses) for leaf  $[Cl^-]$  (A), root  $[Cl^-]$  (B), their difference relative to root  $[Cl^-]$  (C), total root dry weight (E), and fine root dry weight (D). Robustness (small slope) in A and C is related to salt tolerance.  $G \times E$  interactions were significant in traits depicted in A, B, C, and E (Table S3).  $G \times E$  interactions in A, B, and C are driven by changes in variances between salinity levels, while those in E are driven by changes in ranking of responses to salinity.

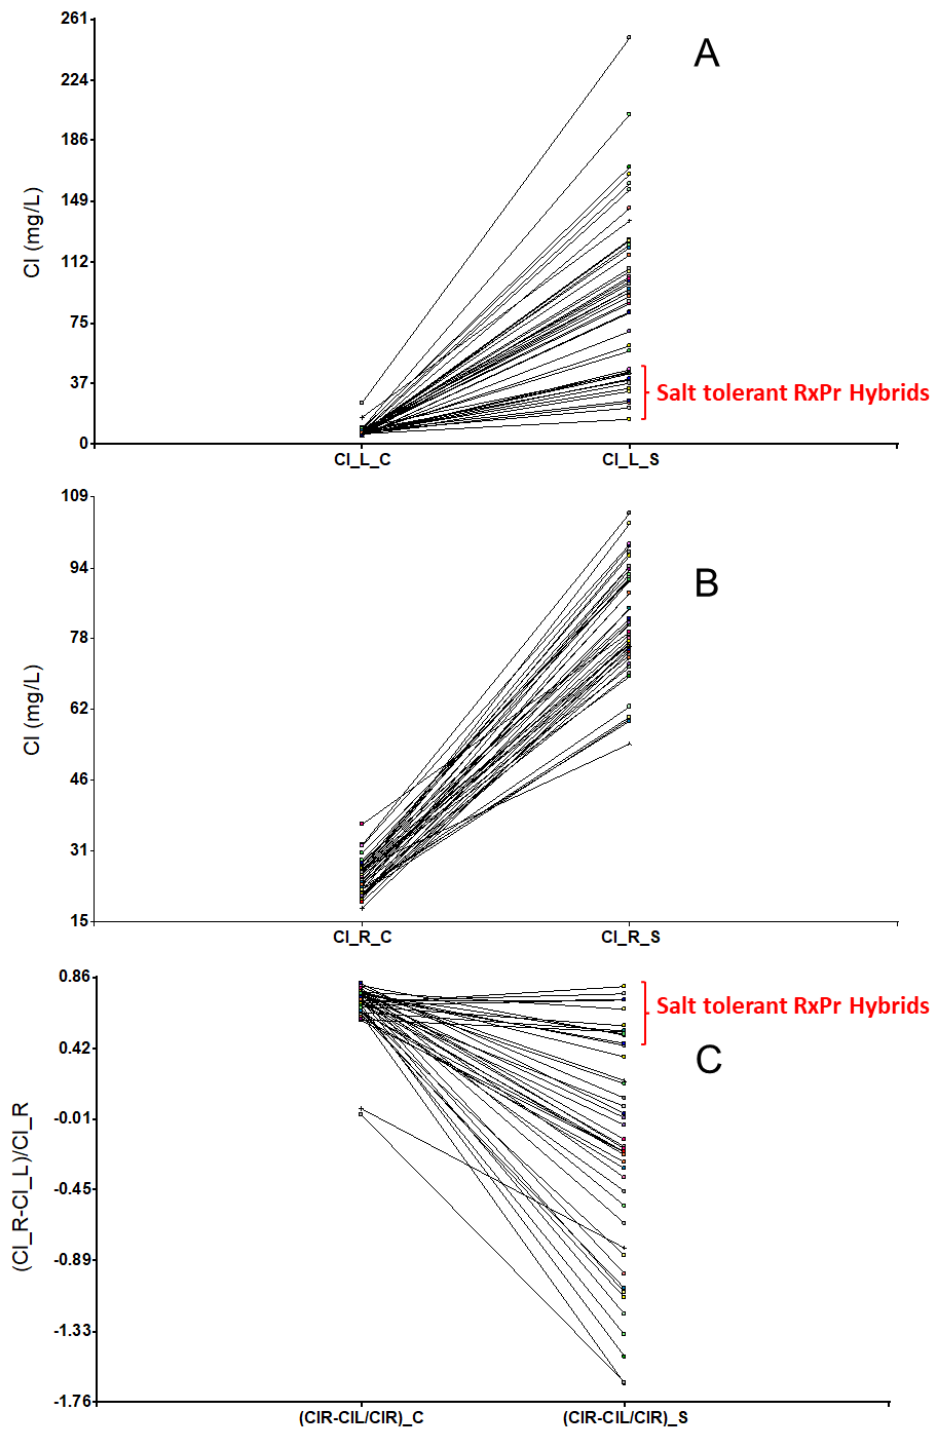

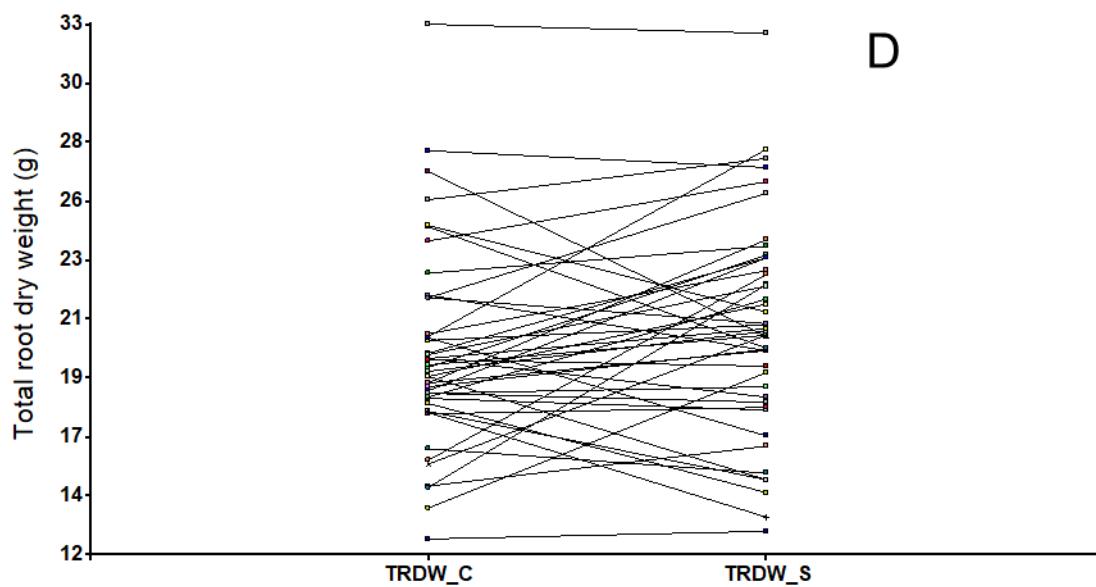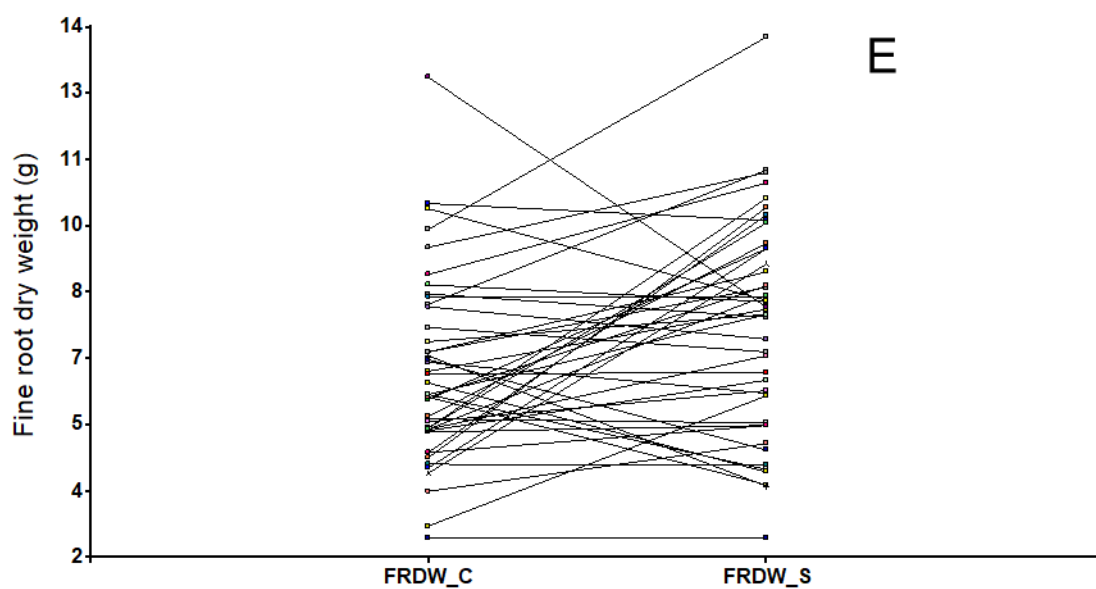

**Figure S6.** Means and standard deviations for total root dry weight (TRDW) and fine root dry weight (FRDW) of hybrids and parents (Cleopatra, Cleo, and trifoliata orange, Rich). Salt-tolerant and salt-sensitive hybrids (107 and 90, respectively) are indicated by an arrow (black and red, respectively).

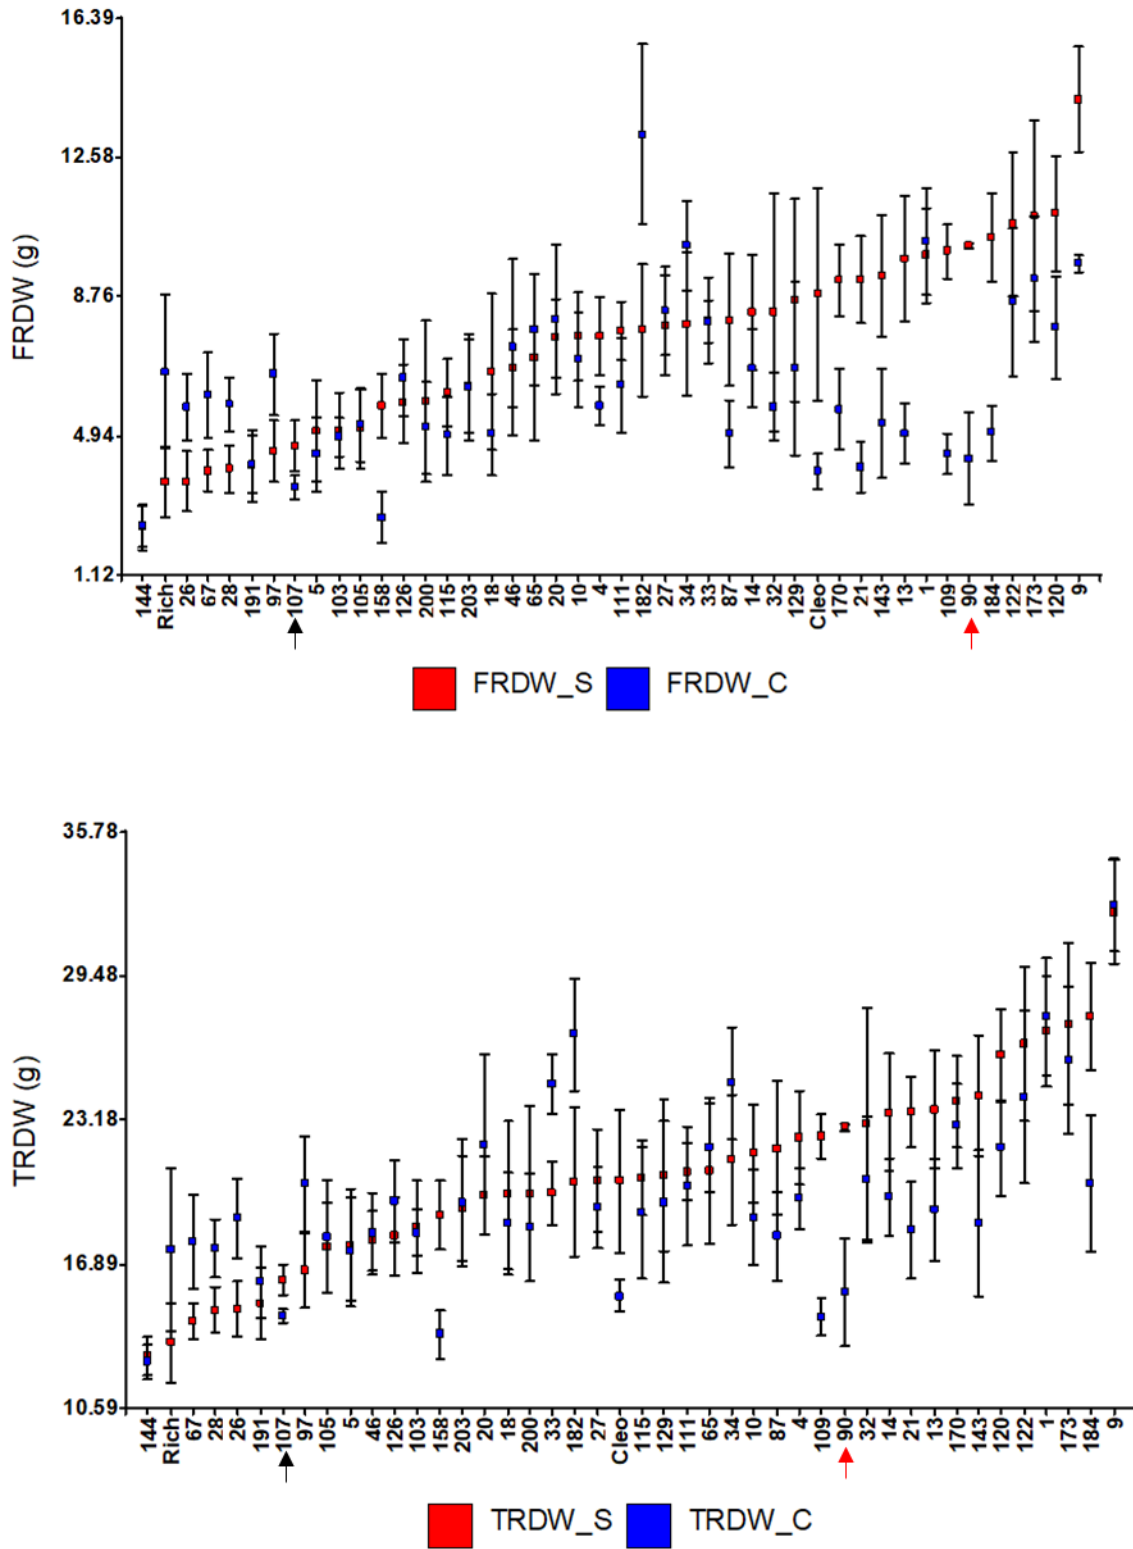

**Figure S7.** LOD profiles of QTLs in linkage group 4c (*C. clementina* scaffold 6), including those related to leaf Cl<sup>-</sup> under salinity conditions (Cl<sub>L</sub>\_S, dCl<sub>L</sub> and (CIR-CIL/CIR)<sub>S</sub>) in NG experiment. Genetic positions (markers) along the integrated *Citrus reshni*-*Poncirus trifoliata* linkage group 4c are shown under the X axis. Linkage group- and genome-wide LOD critical values are indicated by a thin and a thick horizontal red line, respectively.

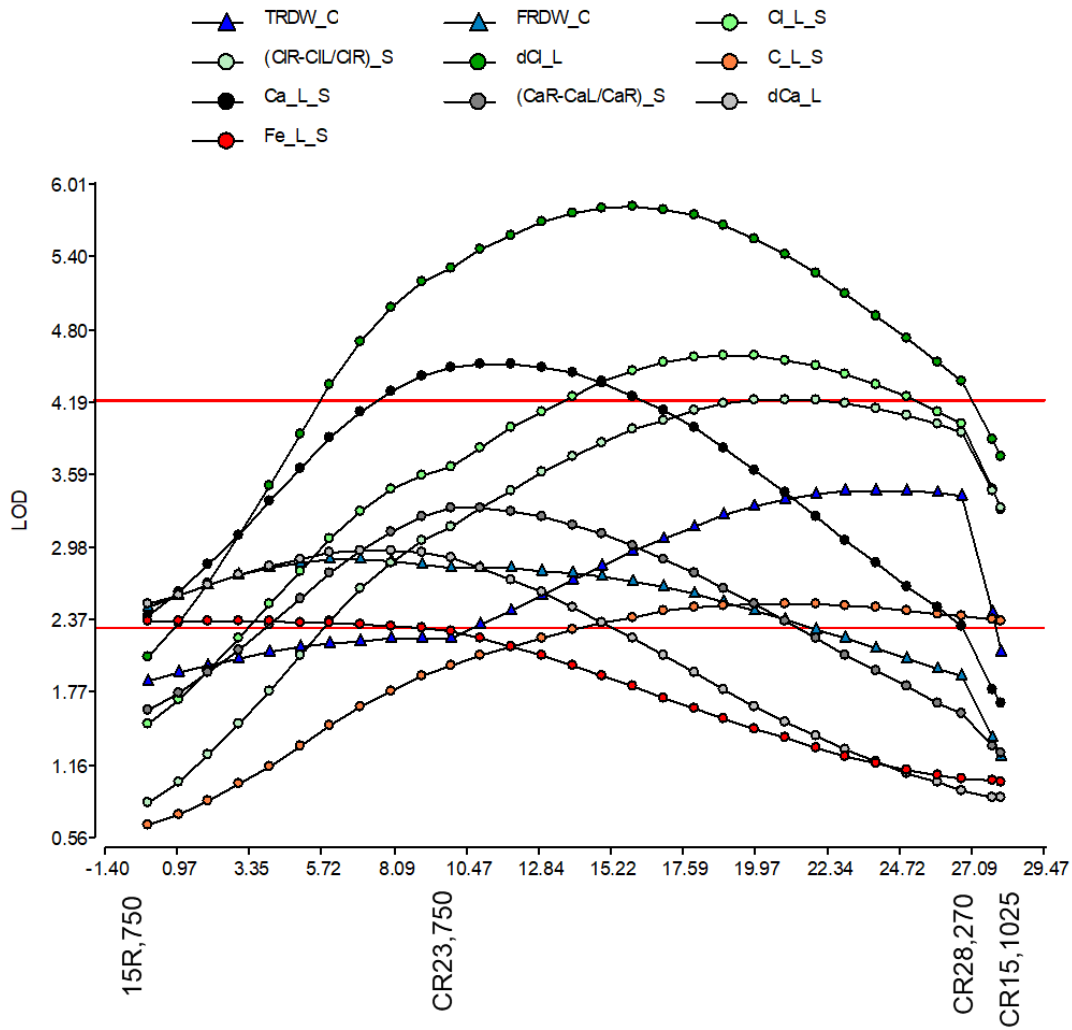



**Figure S8.** Genotypic means at significant marker CR23,750 for Cl\_L\_S (divided by 10), Ca\_L\_S (divided by 1000), dCl\_L, (CIR-CIL/CIR)\_S, (CaR-CaL/CaR)\_S and dCa\_L.

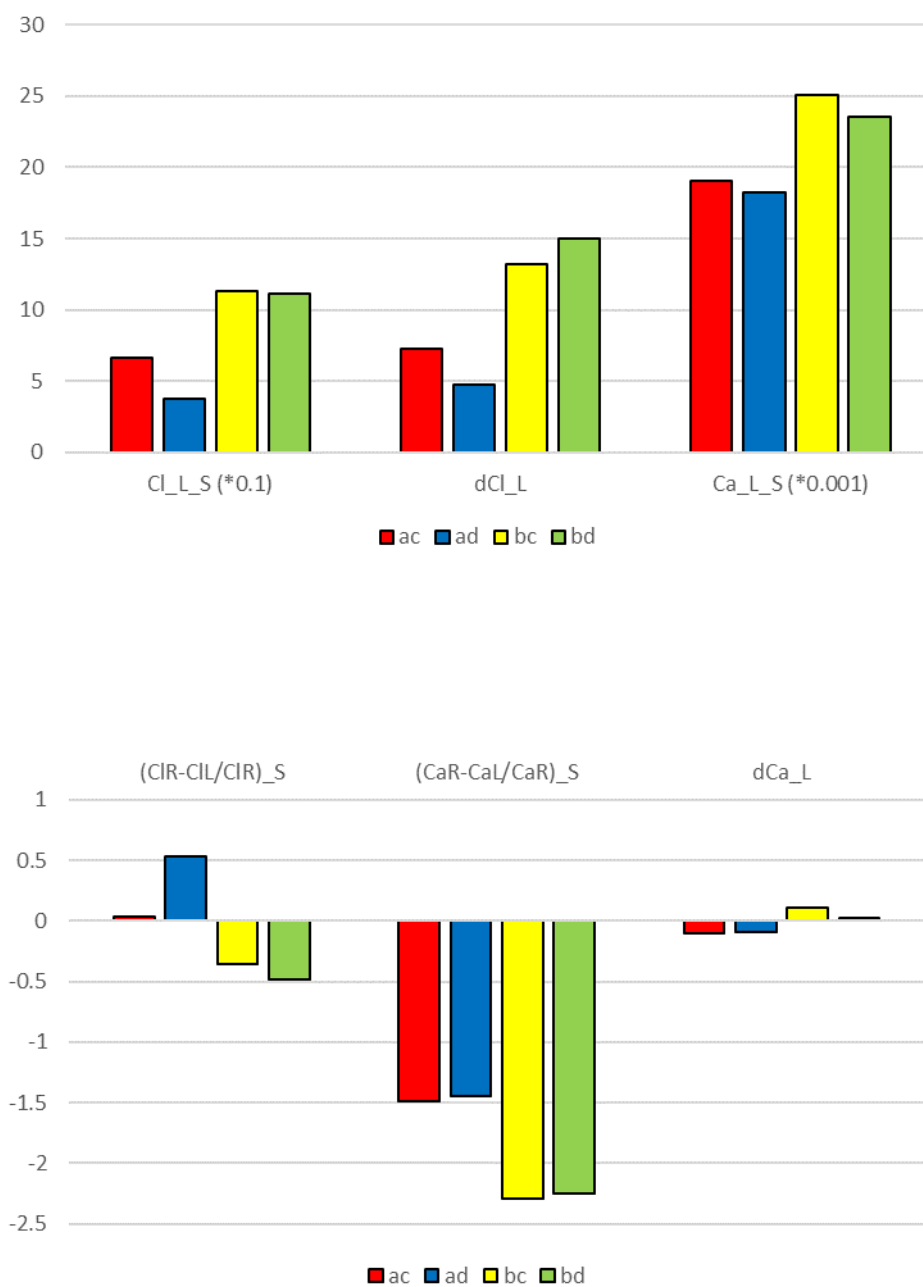

**Figure S9.** Alignment of translated sequences for alleles at locus NPF5.9 (Ciclev10013337m/Potrif.0006s0823.1) in 22-7 (bb), 107 (ac) and 90 (bc) trees.

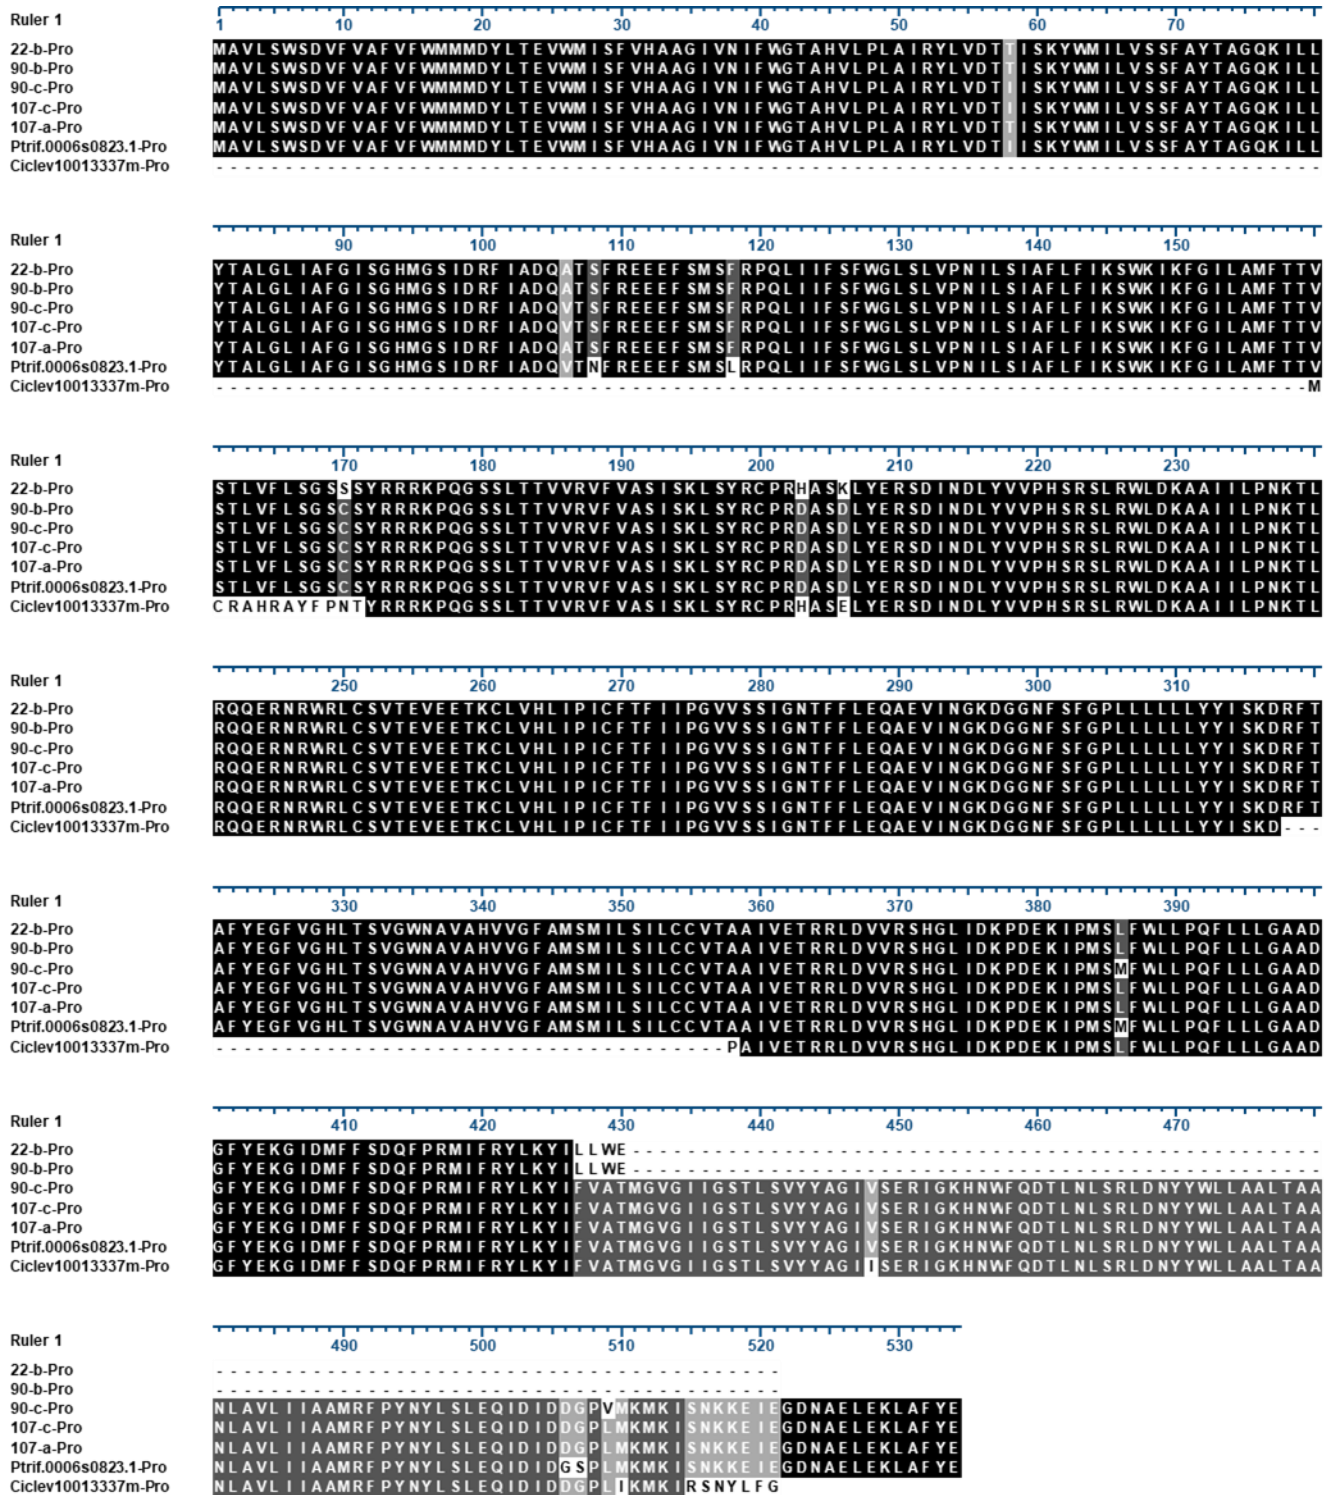

**Figure S10.** Alignment of translated sequences for alleles at locus PIP2.1 (Ciclev10012375m/Ptrif.0006s0419.1) in 22-7 (bb), 107 (ac) and 90 (bc) trees.

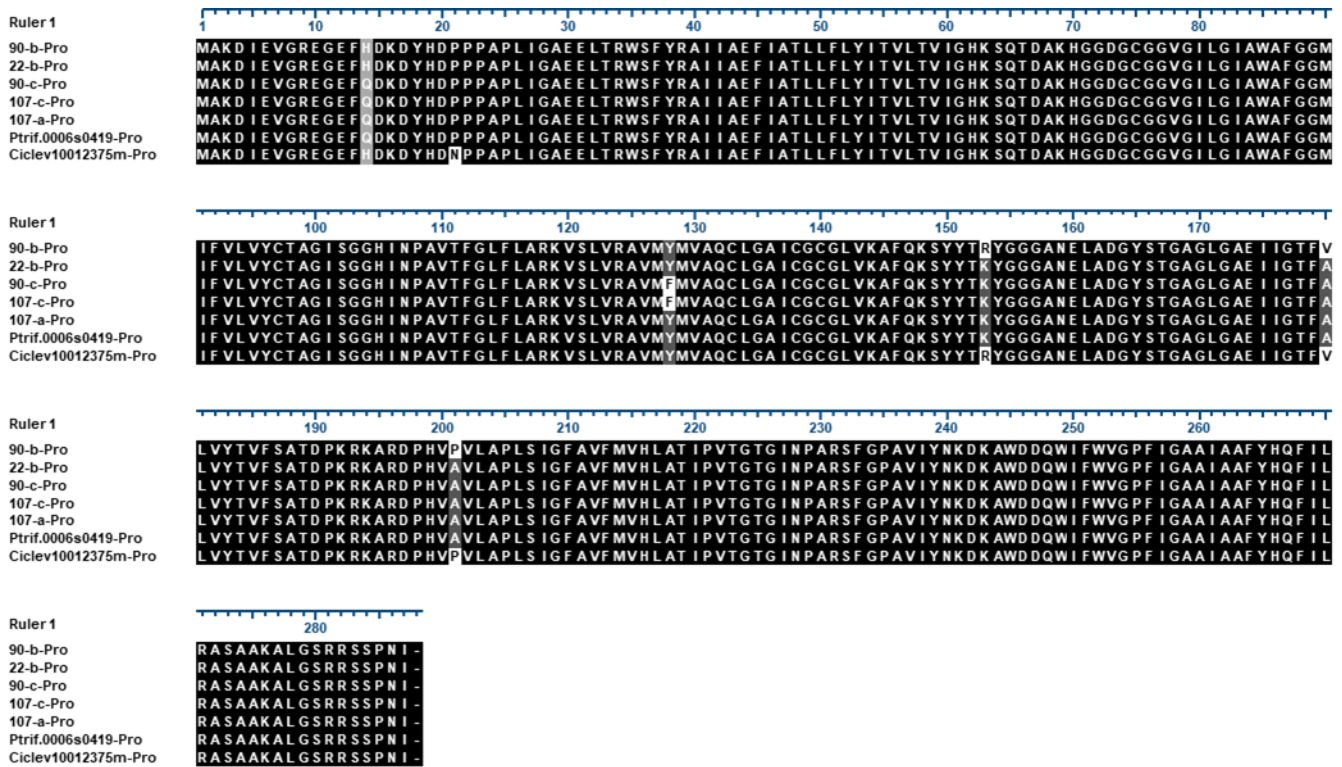

**Figure S11.** Alignment of translated sequences for alleles at Major Facilitator Superfamily protein locus Ciclev10011745m/Ptrif.0006s0610.1 in 22-7 (bb), 107 (ac) and 90 (bc) trees.

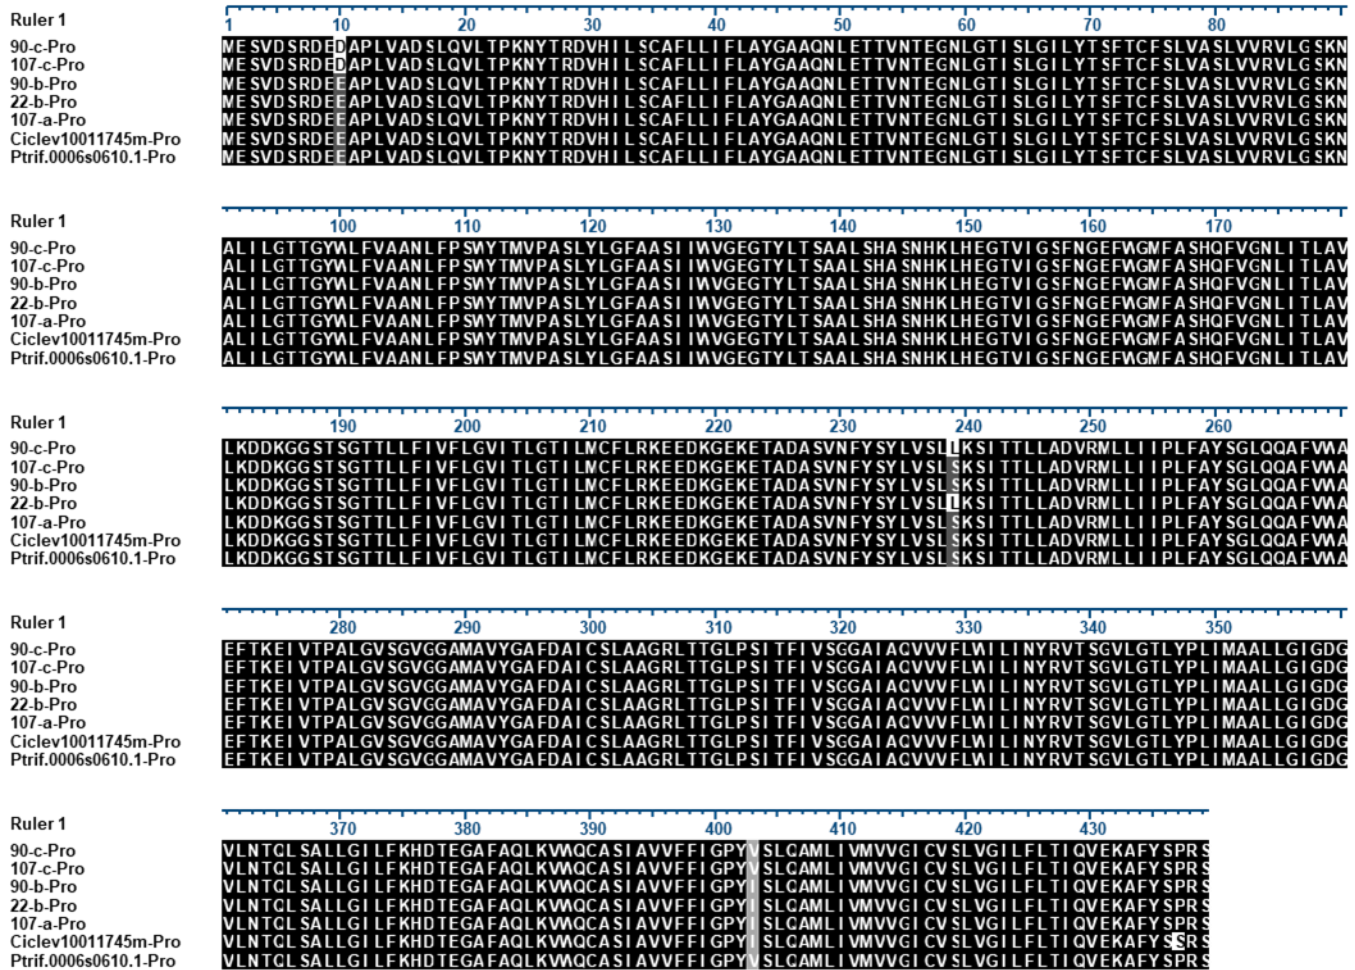

**Figure S12.** Read mapping of candidate genes coding for NPF5.9 (A), MSF (B), NPF5.12 (C), NPF8.2 (D) and PIP2.1 (E) using the genomic sequences (alleles a and b from *C. reshni*) as reference. In all cases, the upper mapping corresponds to reads from genotype 107, while the bottom mapping corresponds to reads from genotype 90; the range in the top left part (below the protein and allele) reflects coverage as a surrogate of expression level. The red lines and names correspond to the predicted transcript of *C. clementina* that codes for the corresponding protein. In the case of MSF (B), the green and blue lines and names correspond to alternative isoforms described for the same gene. Black/gray lines and names for NPF5.9 (A) and NPF8.2 (D) correspond to orthologous transcripts that explain the mapping in this region. In panel A, XM\_006481338 corresponds to a protein similar to that belonging to the NRT1/PTR family 5.5 (NPF5.5) of proton-dependent nitrate and oligopeptide transporters (DOI: 10.1038/srep07962), XM\_024181054 is a predicted *Citrus clementina* putative disease resistance protein RGA3, XM\_052437161 is a *Citrus sinensis* uncharacterized protein, and XM\_025095325 is also a *Citrus sinensis* hypothetical protein. In panel D, the transcribed regions surrounding ESR42548 did not match any significant predicted orthologue in plants.

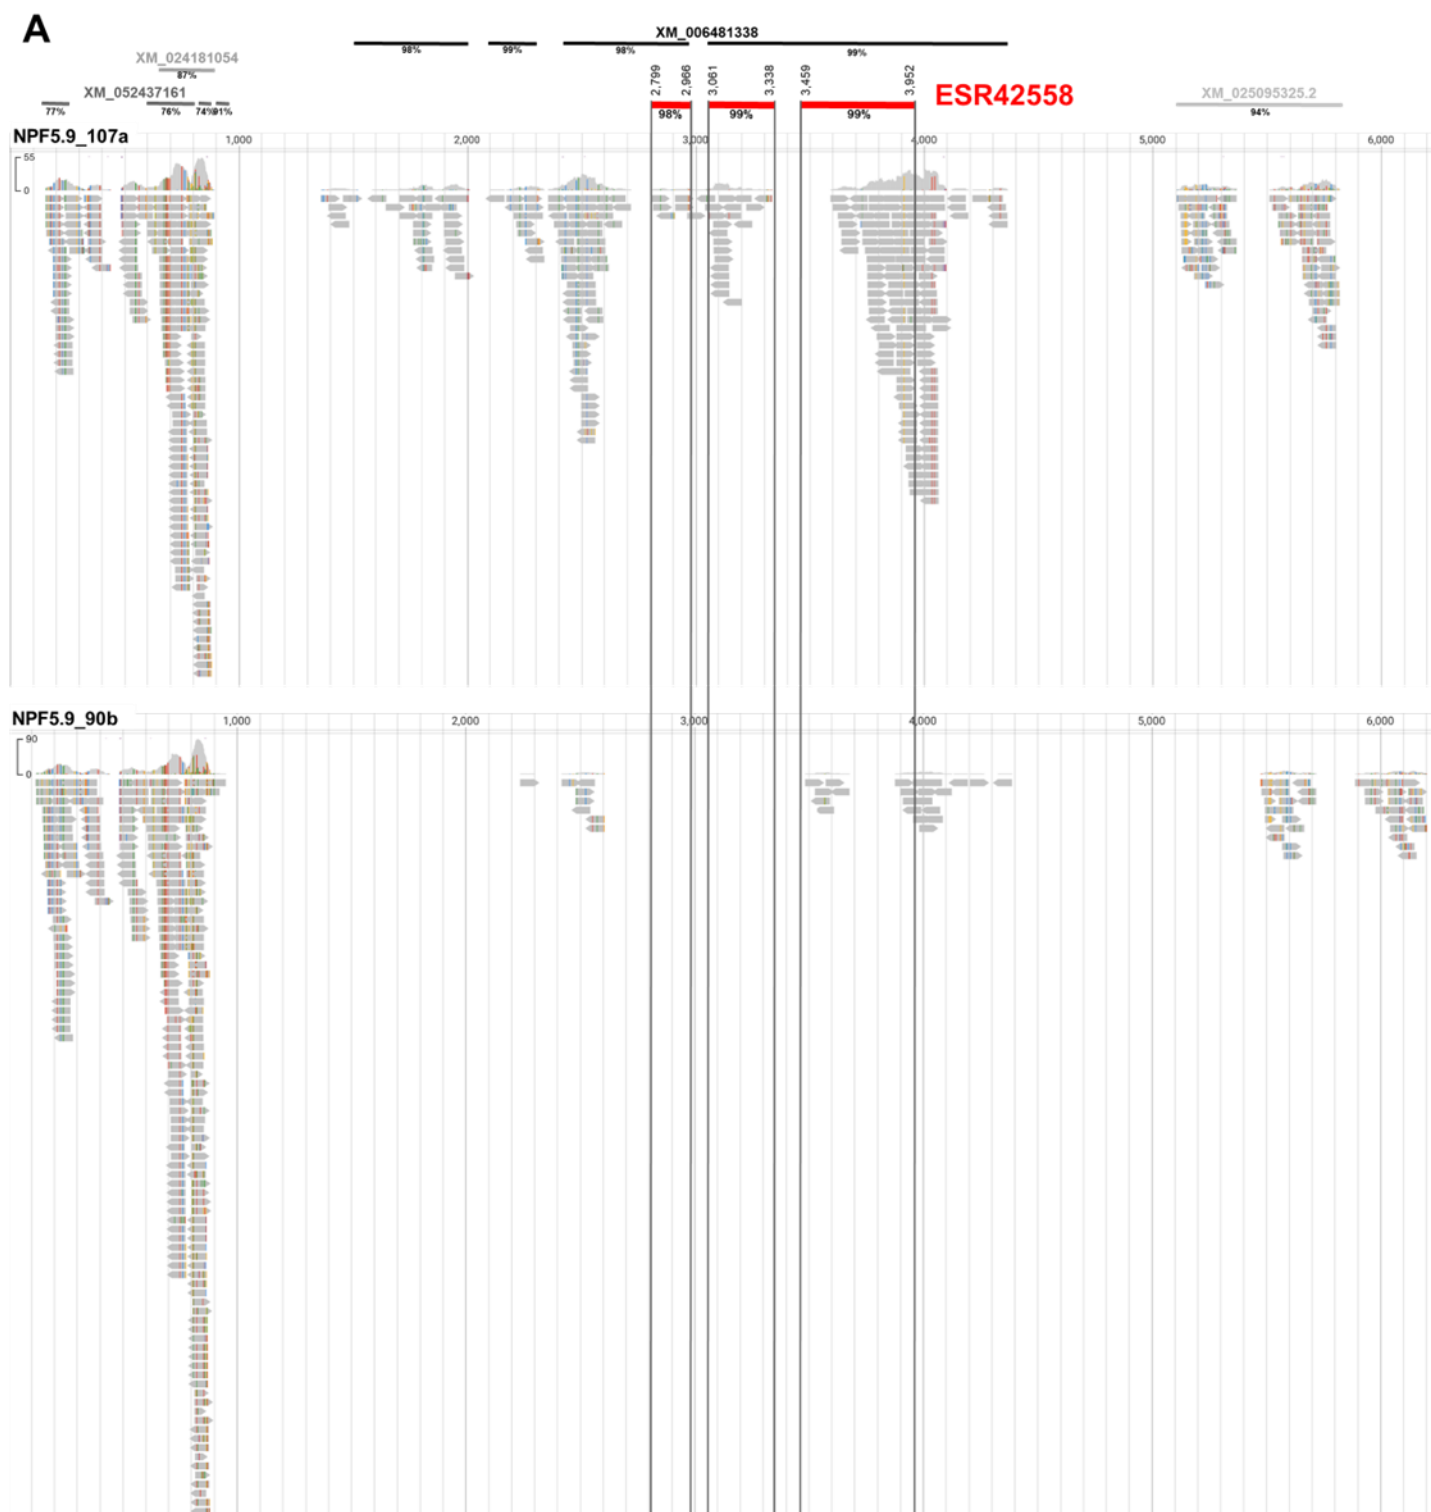

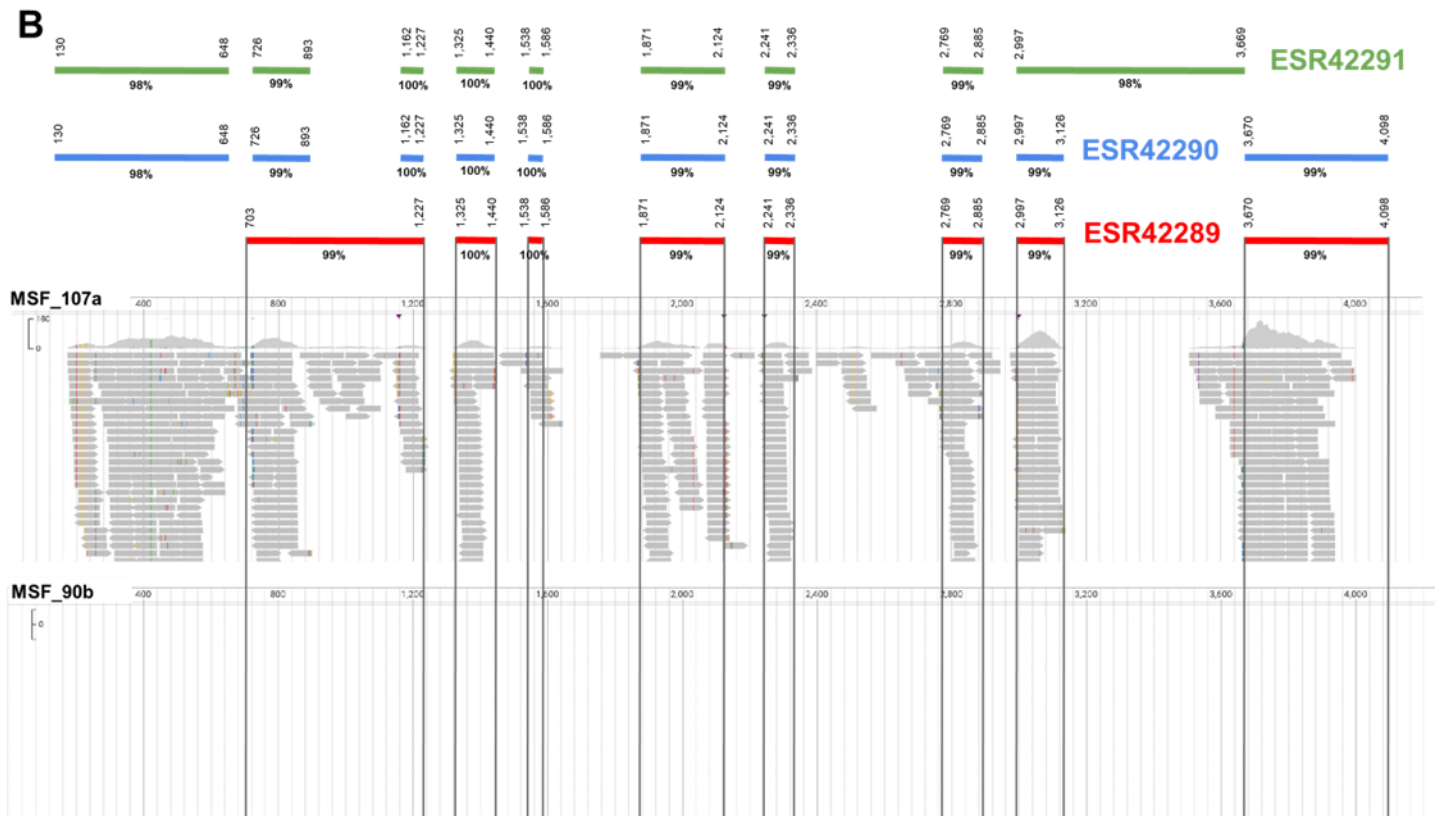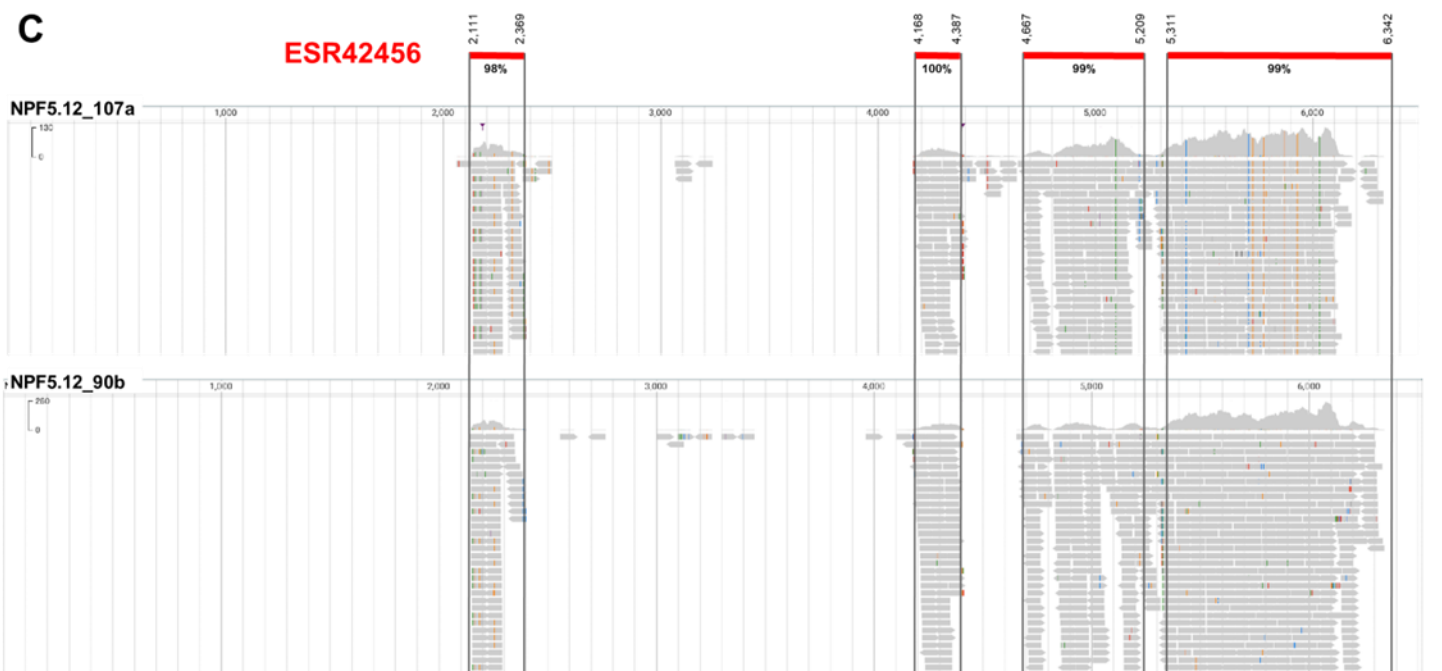

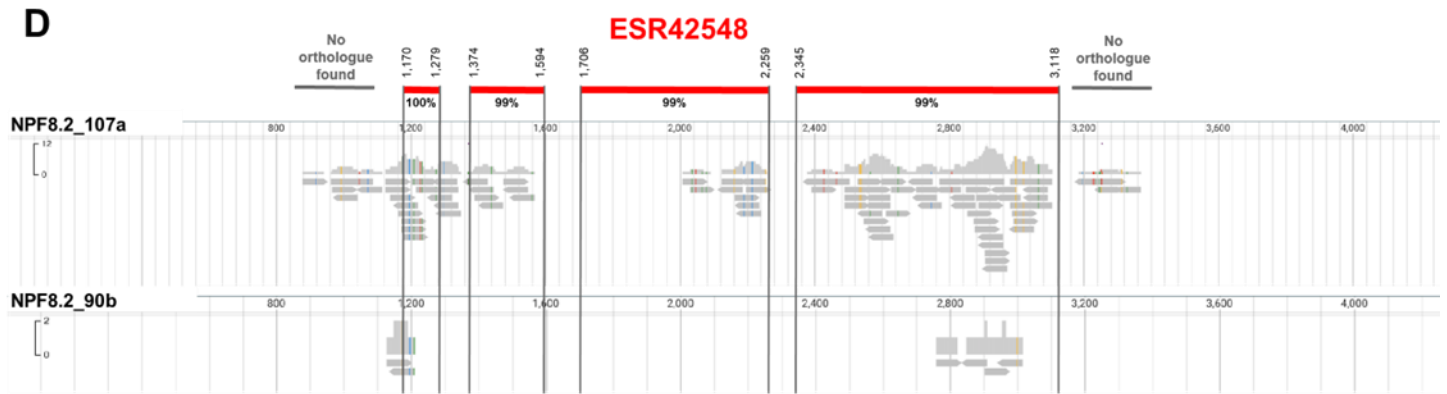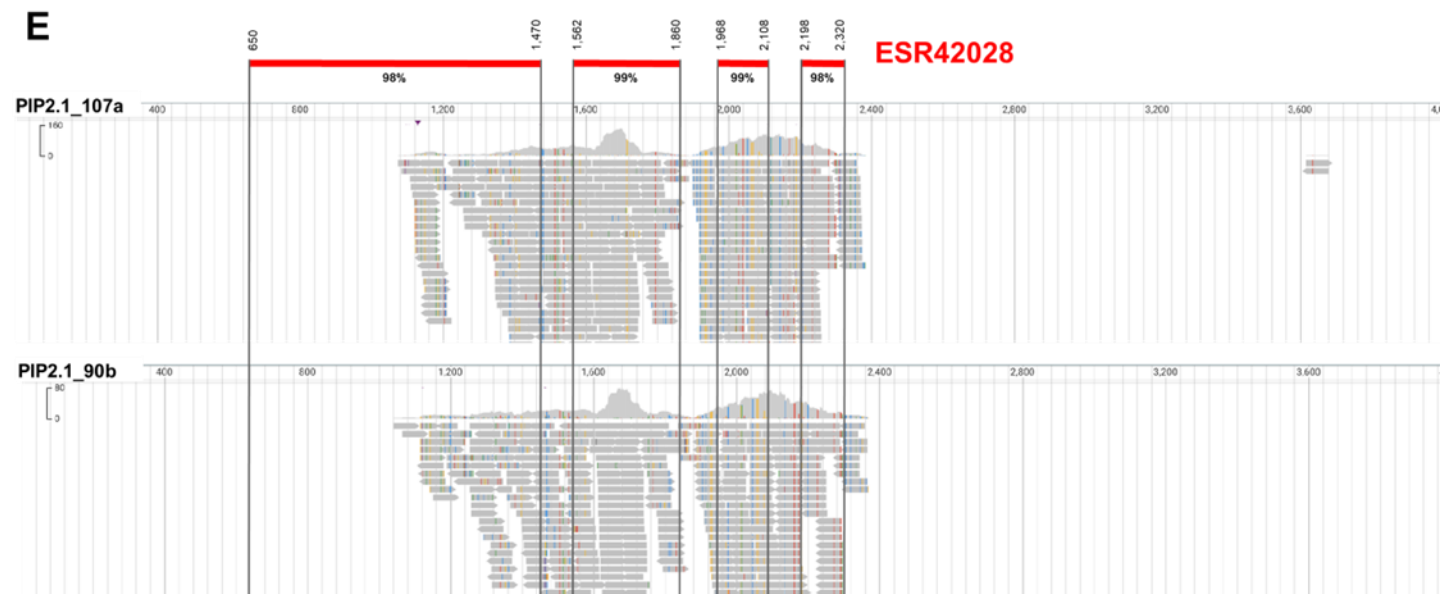

**Figure S13.** Expression patterns represented as normalized mean counts per million (cpm) reads mapped after agglomerative hierarchical clustering (AHC) for DEGs in *LCl-6*. Cpm was normalized using the CTF method and then scaled, the similarity matrix was obtained using Euclidean distances, Ward's minimum variance method was used for linkage, and, finally, a dynamic clustering approach was used to group genes in clusters AHC-1, AHC-2 and AHC-3. It can be seen that genes in AHC-1 exhibit a slight increase in expression under salt stress conditions in 107, but decreased in 90.

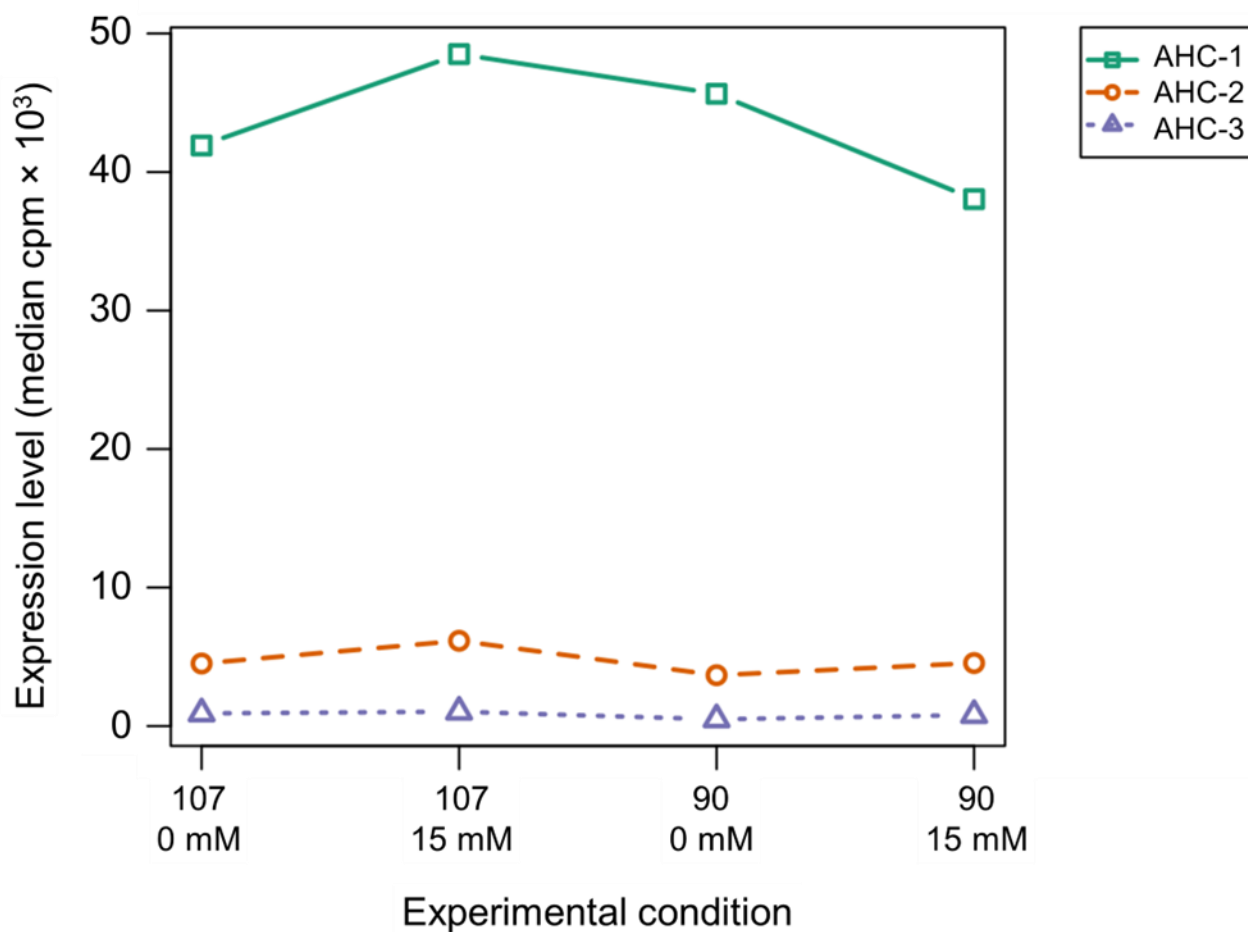



**Figure S14.** Relationship between genetic (X axis) and physical (Y axis) positions for linkage groups 4c (A) and R4c (B) in *C. clementina* scaffold 6.

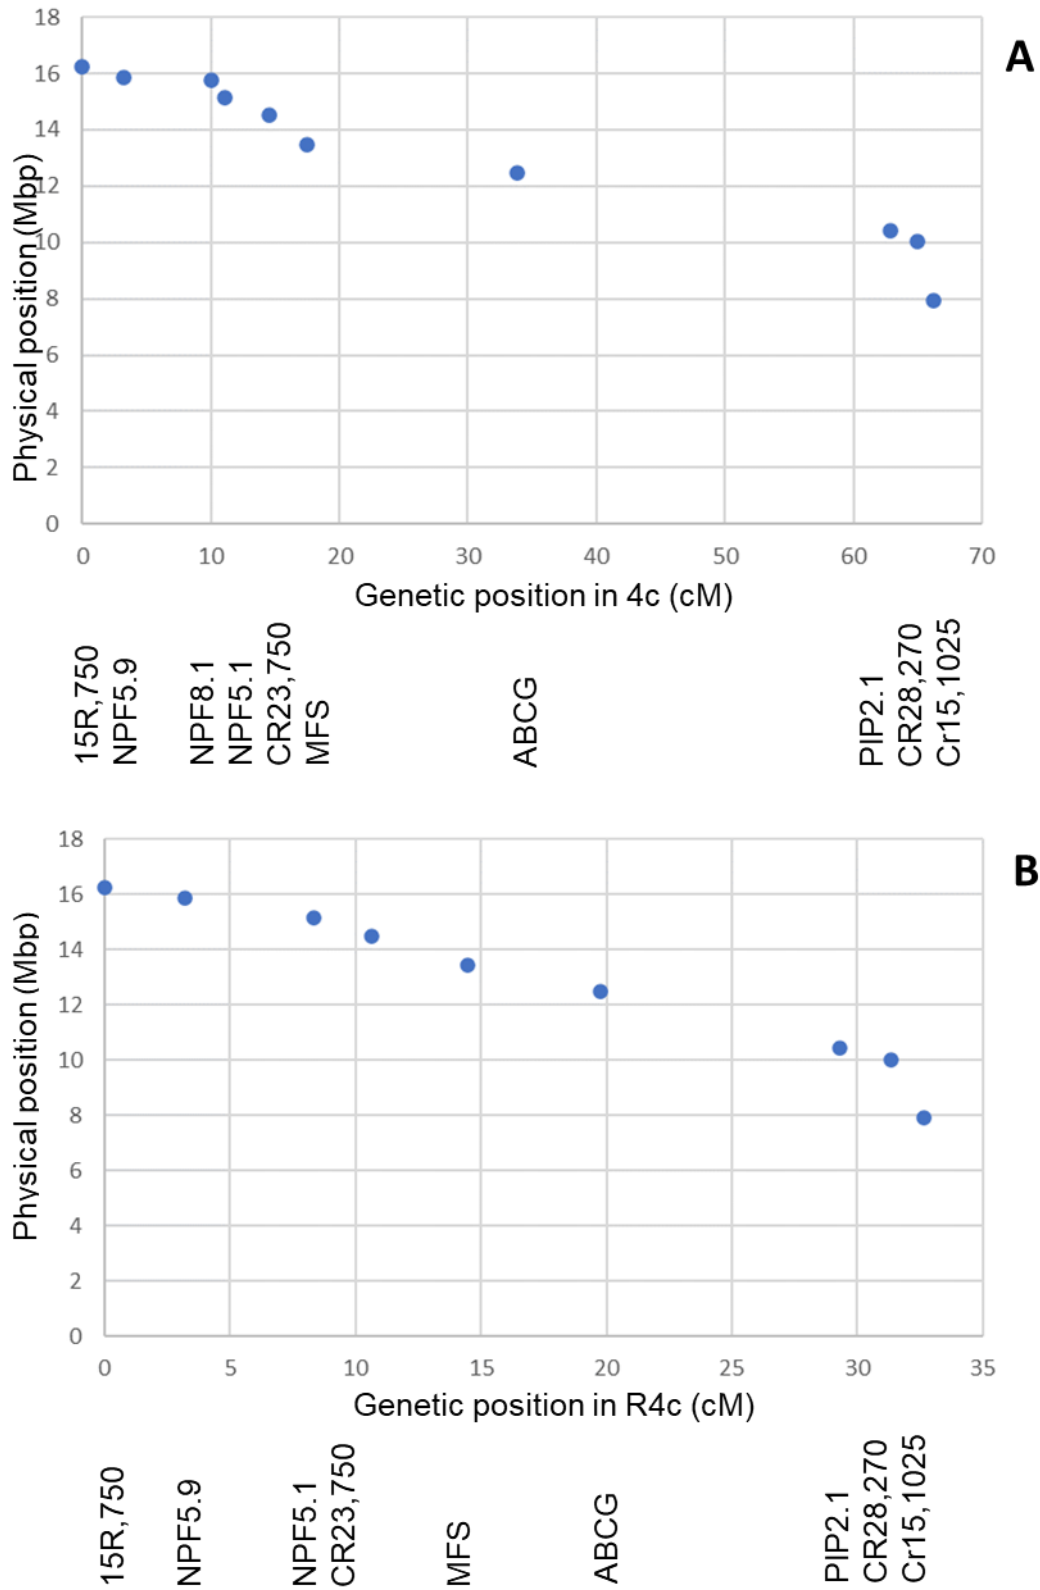

**Figure S15.** LOD profiles of QTLs for fruit yield- (NFp and TFW) and root mass- (TRDW and FRDW) related traits and leaf Fe under salinity conditions in the grafted-population experiment. The X axis shows linkage map group 4c after incorporating candidate genes. The red horizontal line indicates significant level.

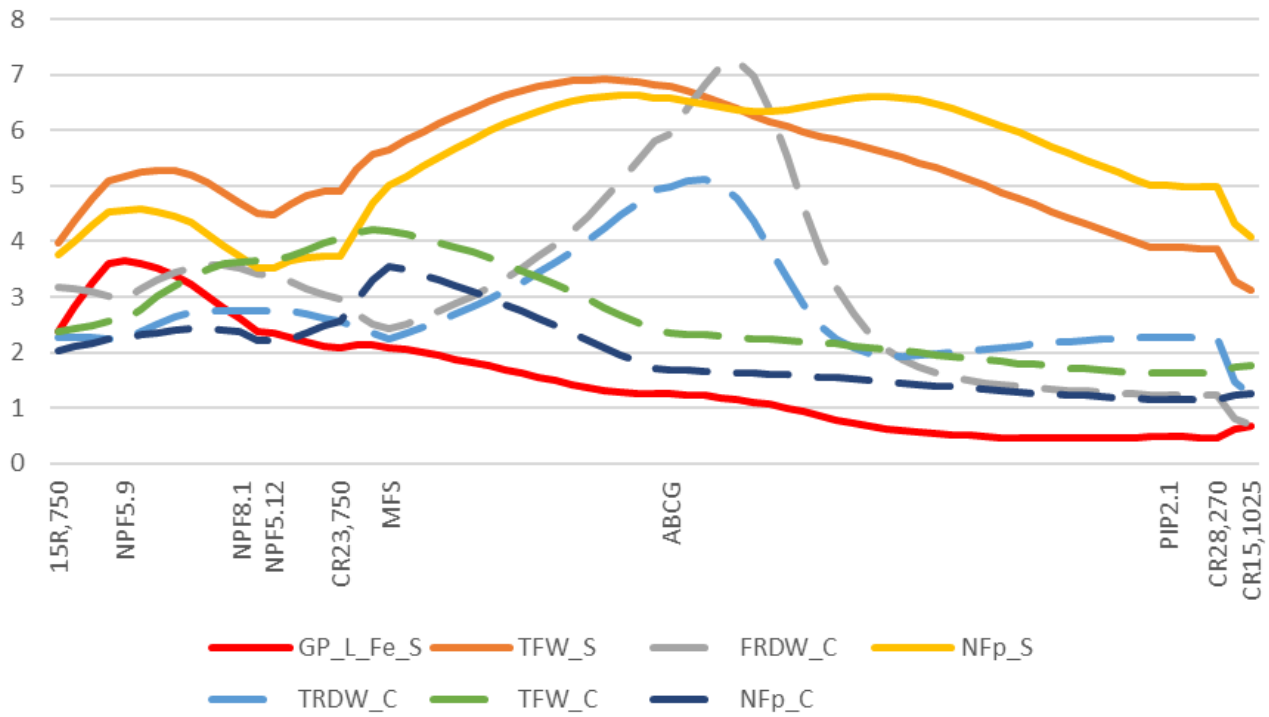

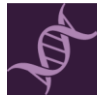

**Table S1.** Trait abbreviations and heritability estimates (H2\_C and H2\_S for control and salinity treatments, respectively) and *p* values for the significant effects in the mixed model analysis of evaluated traits in GP experiment. G and E denote genotype and salinity effects, respectively. ns: non-significant, ne: not estimated.

| Trait Abbreviation | Trait                                                        | H2_C   | H2_S   | G       | E      | GxE     |
|--------------------|--------------------------------------------------------------|--------|--------|---------|--------|---------|
| A1                 | Juice titrable acidity at 1st harvesting date                | 0.0669 | 0.2001 | ns      | ns     | ne      |
| A2                 | Juice titrable acidity at 2nd harvesting date                | 0.0510 | 0.0289 | ns      | ns     | ne      |
| Ca_L               | Leaf Ca concentration (ppm)                                  | 0.0000 | 0.2326 | 0.0099  | ns     | ns      |
| Cl_L               | Leaf Cl concentration (mg L <sup>-1</sup> )                  | 0.2397 | 0.4027 | <0.0001 | ns     | <0.0001 |
| Fe_L               | Leaf Fe concentration (ppm)                                  | 0.0731 | 0.2525 | 0.0005  | ns     | ns      |
| FW1                | Fruit weight 1st harvesting date (g)                         | 0.0695 | 0.0071 | ns      | ns     | ne      |
| FW2                | Fruit weight 2nd harvesting date (g)                         | 0.0000 | 0.0831 | ns      | 0.0226 | ne      |
| K_L                | Leaf K concentration (ppm)                                   | 0.0000 | 0.1247 | 0.01    | 0.0137 | ns      |
| Na_L               | Leaf Na concentration (ppm)                                  | 0.1153 | 0.2576 | <0.0001 | 0.0003 | 0.0001  |
| NFp                | number of normal, ripe fruits                                | 0.1582 | 0.1790 | ne      | ne     | ne      |
| SSC1               | Juice soluble-solids content at 1st harvesting date          | 0.1198 | 0.3490 | <0.0001 | 0.037  | ne      |
| SSC2               | Juice soluble-solids content at 2nd harvesting date          | 0.0248 | 0.4587 | <0.0001 | ns     | ne      |
| TChl               | total chlorophyll leaf concentration (μmol m <sup>-2</sup> ) | 0.0000 | 0.1015 | ns      | 0.0376 | 0.0223  |
| TFW                | total fruit weight (g)                                       | 0.2601 | 0.3097 | <0.0001 | 0.0048 | ns      |

**Table S2.** Spearman coefficients (r) of significantly correlated traits ( $p < 0.05$ ) among traits evaluated in the GP experiment under control and salinity conditions, and for each trait under both salinity conditions.

| Trait 1_C | Trait 2_C | r     | p-value | Trait 1_S | Trait 2_S | r     | p-value | Trait_C | Trait_S | r     | p-value |
|-----------|-----------|-------|---------|-----------|-----------|-------|---------|---------|---------|-------|---------|
| A1        | A2        | 0.57  | <0.0001 | A1        | A2        | 0.60  | <0.0001 | Na_L_C  | Na_L_S  | -0.38 | 0.0049  |
| A1        | NFp       | 0.38  | 0.0050  | A1        | SSC1      | 0.38  | 0.0048  | NFp_C   | NFp_S   | 0.28  | 0.0372  |
| A1        | SSC1      | 0.67  | <0.0001 | A1        | SSC2      | 0.51  | 0.0001  | SSC_1_C | SSC_1_S | 0.39  | 0.0043  |
| A1        | SSC2      | 0.61  | <0.0001 | A1        | TChl      | -0.40 | 0.0031  | TFW_C   | TFW_S   | 0.39  | 0.0034  |
| A1        | TFW       | 0.28  | 0.0411  | A2        | SSC2      | 0.30  | 0.0323  |         |         |       |         |
| A2        | SSC2      | 0.44  | 0.0012  | A2        | TChl      | -0.41 | 0.0022  |         |         |       |         |
| Ca_L      | A2        | -0.42 | 0.0020  | Ca_L      | Fe_L      | 0.64  | <0.0001 |         |         |       |         |
| Ca_L      | Cl_L      | 0.54  | <0.0001 | Ca_L      | K_L       | -0.62 | <0.0001 |         |         |       |         |
| Ca_L      | K_L       | -0.39 | 0.0035  | Ca_L      | NFp       | 0.47  | 0.0002  |         |         |       |         |
| Ca_L      | Na_L      | 0.57  | <0.0001 | Ca_L      | TChl      | 0.29  | 0.0313  |         |         |       |         |
| Cl_L      | A2        | -0.33 | 0.0165  | Ca_L      | TFW       | 0.41  | 0.0019  |         |         |       |         |
| Cl_L      | K_L       | -0.30 | 0.0243  | Cl_L      | Fe_L      | -0.43 | 0.0015  |         |         |       |         |
| Cl_L      | Na_L      | 0.88  | <0.0001 | Cl_L      | K_L       | 0.31  | 0.0198  |         |         |       |         |
| Fe_L      | NFp       | 0.30  | 0.0257  | Cl_L      | Na_L      | 0.57  | <0.0001 |         |         |       |         |
| Fe_L      | TFW       | 0.39  | 0.0032  | Cl_L      | NFp       | -0.46 | 0.0003  |         |         |       |         |
| FW1       | A1        | -0.52 | 0.0001  | Cl_L      | SSC1      | -0.48 | 0.0003  |         |         |       |         |
| FW1       | K_L       | 0.29  | 0.0370  | Cl_L      | SSC2      | -0.39 | 0.0047  |         |         |       |         |
| FW1       | NFp       | -0.37 | 0.0068  | Cl_L      | TChl      | -0.50 | 0.0002  |         |         |       |         |
| FW1       | SSC1      | -0.46 | 0.0005  | Cl_L      | TFW       | -0.59 | <0.0001 |         |         |       |         |
| FW1       | SSC2      | -0.37 | 0.0071  | Fe_L      | K_L       | -0.39 | 0.0038  |         |         |       |         |
| Na_L      | A2        | -0.41 | 0.0023  | Fe_L      | NFp       | 0.32  | 0.0137  |         |         |       |         |
| NFp       | SSC1      | 0.54  | <0.0001 | Fe_L      | TChl      | 0.49  | 0.0002  |         |         |       |         |
| NFp       | SSC2      | 0.47  | 0.0005  | Fe_L      | TFW       | 0.40  | 0.0031  |         |         |       |         |
| NFp       | TFW       | 0.95  | <0.0001 | FW1       | A1        | -0.45 | 0.0006  |         |         |       |         |

---

|      |      |      |         |      |      |       |         |
|------|------|------|---------|------|------|-------|---------|
| SSC1 | SSC2 | 0.66 | <0.0001 | FW1  | A2   | -0.28 | 0.0428  |
| SSC1 | TFW  | 0.52 | 0.0001  | FW1  | K_L  | 0.28  | 0.0418  |
| SSC2 | TFW  | 0.37 | 0.0070  | FW1  | NFp  | -0.32 | 0.0178  |
|      |      |      |         | FW1  | SSC1 | -0.49 | 0.0002  |
|      |      |      |         | FW1  | SSC2 | -0.45 | 0.0008  |
|      |      |      |         | K_L  | NFp  | -0.60 | <0.0001 |
|      |      |      |         | K_L  | SSC1 | -0.41 | 0.0023  |
|      |      |      |         | K_L  | SSC2 | -0.37 | 0.0064  |
|      |      |      |         | K_L  | TFW  | -0.49 | 0.0002  |
|      |      |      |         | Na_L | NFp  | -0.43 | 0.0009  |
|      |      |      |         | Na_L | TFW  | -0.52 | 0.0001  |
|      |      |      |         | NFp  | SSC1 | 0.59  | <0.0001 |
|      |      |      |         | NFp  | SSC2 | 0.42  | 0.0019  |
|      |      |      |         | NFp  | TFW  | 0.92  | <0.0001 |
|      |      |      |         | SSC1 | SSC2 | 0.77  | <0.0001 |
|      |      |      |         | SSC1 | TFW  | 0.44  | 0.0009  |
|      |      |      |         | TChl | TFW  | 0.32  | 0.0170  |

**Table S3.** Trait abbreviations and heritability estimates (H2\_C and H2\_S for control and salinity treatments, respectively) and *p* values for the significant effects in the mixed model analysis of evaluated traits in the NG experiment. G and E denote genotype and salinity effects, respectively. ns: non-significant.

| Trait abbreviation | Trait                                       | H2_C   | H2_S   | G       | E       | GxE     |
|--------------------|---------------------------------------------|--------|--------|---------|---------|---------|
| C_L                | Total C leaf concentration (g/100g)         | 0.3501 | 0.4728 | <0.0001 | ns      | 0.0041  |
| C_R                | Total C root concentration (g/100g)         | 0.3161 | 0.2568 | 0.0001  | ns      | 0.0002  |
| Ca_L               | Leaf Ca concentration (ppm)                 | 0.3691 | 0.4866 | <0.0001 | ns      | ns      |
| Ca_R               | Root Ca concentration (ppm)                 | 0.4375 | 0.1559 | <0.0001 | <0.0001 | 0.004   |
| Cl_L               | Leaf Cl concentration (mg L <sup>-1</sup> ) | 0.7354 | 0.644  | <0.0001 | <0.0001 | <0.0001 |
| Cl_R               | Root Cl concentration (mg L <sup>-1</sup> ) | 0.3183 | 0.3667 | <0.0001 | <0.0001 | <0.0001 |
| CIR-CIL/CIR        | $[Cl]_{root} - [Cl]_{leaf} / [Cl]_{root}$   | 0.6325 | 0.5306 | <0.0001 | <0.0001 | <0.0001 |
| Fe_L               | Leaf Fe concentration (ppm)                 | 0      | 0.0397 | 0.0103  | ns      | ns      |
| Fe_R               | Root Fe concentration (ppm)                 | 0.3815 | 0.0689 | <0.0001 | <0.0001 | 0.0024  |
| FRDW               | Fine root dry weight (g)                    | 0.1948 | 0.2155 | <0.0001 | 0.0002  | 0.0187  |
| K_L                | Leaf K concentration (ppm)                  | 0.4401 | 0.4073 | <0.0001 | <0.0001 | 0.0001  |
| K_R                | Root K concentration (ppm)                  | 0.3158 | 0.3355 | <0.0001 | <0.0001 | 0.0015  |
| N_L                | Total N leaf concentration (g/100g)         | 0.1961 | 0.5307 | <0.0001 | <0.0001 | 0.0357  |
| N_R                | Total N root concentration (g/100g)         | 0.4409 | 0.1658 | <0.0001 | <0.0001 | 0.0001  |
| Na_L               | Leaf Na concentration (ppm)                 | 0.4736 | 0.4543 | <0.0001 | <0.0001 | <0.0001 |
| Na_R               | Root Na concentration (ppm)                 | 0.6232 | 0.3492 | <0.0001 | <0.0001 | 0.0256  |
| TRDW               | Total root dry weight (g)                   | 0.1706 | 0.2448 | <0.0001 | ns      | ns      |

**Table S4.** Spearman coefficients (r) of significantly correlated traits ( $p < 0.05$ ) between traits evaluated in the NG experiment under control and salinity conditions, and for each trait under both salinity conditions.

| Trait 1_C      | Trait 2_C      | r     | p-value | Trait 1_S     | Trait 2_S      | r     | p-value | Trait_C       | Trait_S       | r    | p-value |
|----------------|----------------|-------|---------|---------------|----------------|-------|---------|---------------|---------------|------|---------|
| (CaR-CaL/CaR)  | Ca_L           | -0.57 | 0.0001  | (CaR-CaL/CaR) | Ca_L           | -0.87 | <0.0001 | (CaR-CaL/CaR) | (CaR-CaL/CaR) | 0.45 | 0.0028  |
| (CaR-CaL/CaR)  | Ca_R           | 0.67  | <0.0001 | (CaR-CaL/CaR) | Ca_R           | 0.56  | 0.0001  | C_L           | C_L           | 0.46 | 0.0019  |
| (CaR-CaL/CaR)  | d(CaR-CaL/CaR) | 0.53  | 0.0003  | (CaR-CaL/CaR) | d(CaR-CaL/CaR) | -0.42 | 0.006   | Ca_L          | Ca_L          | 0.64 | <0.0001 |
| (CaR-CaL/CaR)  | dCa_L          | 0.34  | 0.0262  | (CaR-CaL/CaR) | dCa_L          | -0.47 | 0.0018  | Ca_R          | Ca_R          | 0.42 | 0.0076  |
| (CaR-CaL/CaR)  | Na_R           | 0.44  | 0.0038  | (CaR-CaL/CaR) | dCa_R          | 0.45  | 0.0029  | Cl_R          | Cl_R          | 0.40 | 0.0081  |
| (CIR-CIL/CIR)  | Ca_L           | -0.38 | 0.0122  | (CaR-CaL/CaR) | Fe_R           | 0.33  | 0.0347  | FRDW          | FRDW          | 0.36 | 0.0191  |
| (CIR-CIL/CIR)  | Cl_R           | 0.58  | 0.0001  | (CaR-CaL/CaR) | K_R            | 0.34  | 0.0278  | K_L           | K_L           | 0.32 | 0.0395  |
| (CIR-CIL/CIR)  | K_R            | 0.40  | 0.0085  | (CIR-CIL/CIR) | (CaR-CaL/CaR)  | 0.48  | 0.0013  | N_L           | N_L           | 0.32 | 0.0385  |
| C_L            | (CaR-CaL/CaR)  | 0.36  | 0.0182  | (CIR-CIL/CIR) | C_R            | -0.31 | 0.0455  | Na_L          | Na_L          | 0.60 | <0.0001 |
| C_L            | K_L            | -0.58 | 0.0001  | (CIR-CIL/CIR) | Ca_L           | -0.50 | 0.0009  | Na_R          | Na_R          | 0.66 | <0.0001 |
| C_R            | Fe_R           | -0.62 | <0.0001 | (CIR-CIL/CIR) | Cl_R           | 0.46  | 0.0021  | TRDW          | TRDW          | 0.57 | 0.0003  |
| Ca_L           | Fe_L           | 0.39  | 0.0101  | (CIR-CIL/CIR) | d(CaR-CaL/CaR) | -0.56 | 0.0001  |               |               |      |         |
| Ca_L           | K_R            | -0.33 | 0.0371  | (CIR-CIL/CIR) | d(CIR-CIL/CIR) | 1.00  | <0.0001 |               |               |      |         |
| Ca_R           | Fe_R           | 0.32  | 0.0416  | (CIR-CIL/CIR) | dCa_L          | -0.39 | 0.0097  |               |               |      |         |
| Ca_R           | Na_R           | 0.46  | 0.0032  | (CIR-CIL/CIR) | dCa_R          | 0.61  | <0.0001 |               |               |      |         |
| Cl_L           | (CIR-CIL/CIR)  | -0.75 | <0.0001 | (CIR-CIL/CIR) | dCl_L          | -0.85 | <0.0001 |               |               |      |         |
| Cl_L           | Ca_L           | 0.41  | 0.0076  | (CIR-CIL/CIR) | dCl_R          | 0.48  | 0.0013  |               |               |      |         |
| Cl_R           | dCl_R          | -0.45 | 0.0027  | (CIR-CIL/CIR) | K_R            | 0.57  | 0.0001  |               |               |      |         |
| Cl_R           | K_R            | 0.33  | 0.0345  | (CIR-CIL/CIR) | N_L            | 0.67  | <0.0001 |               |               |      |         |
| Cl_R           | Na_R           | 0.47  | 0.0016  | (CIR-CIL/CIR) | Na_L           | -0.56 | 0.0001  |               |               |      |         |
| d(CaR-CaL/CaR) | Ca_R           | 0.69  | <0.0001 | C_L           | (CaR-CaL/CaR)  | 0.35  | 0.0243  |               |               |      |         |
| d(CaR-CaL/CaR) | Fe_R           | 0.35  | 0.0213  | C_L           | Ca_L           | -0.37 | 0.0152  |               |               |      |         |
| d(CaR-CaL/CaR) | Na_R           | 0.52  | 0.0004  | C_L           | K_L            | -0.66 | <0.0001 |               |               |      |         |
| d(CIR-CIL/CIR) | Ca_R           | -0.46 | 0.0019  | C_R           | dCa_L          | -0.39 | 0.0114  |               |               |      |         |
| d(CIR-CIL/CIR) | d(CaR-CaL/CaR) | -0.56 | 0.0001  | C_R           | Fe_R           | -0.42 | 0.0052  |               |               |      |         |

|                |                |       |         |                |                |       |         |
|----------------|----------------|-------|---------|----------------|----------------|-------|---------|
| d(CIR-CIL/CIR) | dCa_L          | -0.41 | 0.0072  | C_R            | K_R            | -0.49 | 0.0009  |
| d(CIR-CIL/CIR) | dCa_R          | 0.60  | <0.0001 | Ca_L           | Fe_L           | 0.33  | 0.0338  |
| d(CIR-CIL/CIR) | dCl_R          | 0.48  | 0.0012  | Ca_L           | Fe_R           | -0.33 | 0.0374  |
| d(CIR-CIL/CIR) | Fe_R           | -0.34 | 0.0294  | Ca_L           | K_L            | 0.32  | 0.0382  |
| d(CIR-CIL/CIR) | N_R            | -0.38 | 0.0141  | Ca_R           | K_R            | 0.43  | 0.0064  |
| dCa_L          | Ca_R           | 0.36  | 0.0184  | Cl_L           | (CaR-CaL/CaR)  | -0.49 | 0.001   |
| dCa_L          | d(CaR-CaL/CaR) | 0.70  | <0.0001 | Cl_L           | (CIR-CIL/CIR)  | -0.96 | <0.0001 |
| dCa_L          | K_R            | 0.36  | 0.0177  | Cl_L           | Ca_L           | 0.54  | 0.0006  |
| dCa_L          | Na_R           | 0.53  | 0.0003  | Cl_L           | d(CaR-CaL/CaR) | 0.59  | <0.0001 |
| dCa_R          | Ca_L           | -0.37 | 0.0149  | Cl_L           | d(CIR-CIL/CIR) | -0.96 | <0.0001 |
| dCa_R          | Ca_R           | -0.71 | <0.0001 | Cl_L           | dCa_L          | 0.45  | 0.003   |
| dCa_R          | d(CaR-CaL/CaR) | -0.80 | <0.0001 | Cl_L           | dCa_R          | -0.58 | 0.0001  |
| dCa_R          | Fe_L           | -0.33 | 0.0356  | Cl_L           | dCl_L          | 0.87  | <0.0001 |
| dCa_R          | Fe_R           | -0.32 | 0.0373  | Cl_L           | dCl_R          | -0.41 | 0.0069  |
| dCa_R          | Na_L           | -0.35 | 0.0219  | Cl_L           | Fe_L           | 0.35  | 0.0267  |
| dCa_R          | Na_R           | -0.33 | 0.0307  | Cl_L           | K_L            | 0.34  | 0.0301  |
| dCl_L          | Ca_R           | 0.33  | 0.0358  | Cl_L           | K_R            | -0.53 | 0.0007  |
| dCl_L          | d(CaR-CaL/CaR) | 0.50  | 0.0007  | Cl_L           | N_L            | -0.61 | <0.0001 |
| dCl_L          | d(CIR-CIL/CIR) | -0.83 | <0.0001 | Cl_L           | Na_L           | 0.57  | 0.0003  |
| dCl_L          | dCa_L          | 0.39  | 0.0108  | Cl_R           | C_R            | -0.47 | 0.0018  |
| dCl_L          | dCa_R          | -0.46 | 0.0024  | Cl_R           | d(CIR-CIL/CIR) | 0.46  | 0.002   |
| dCl_L          | dCl_R          | -0.47 | 0.0018  | Cl_R           | dCa_R          | 0.31  | 0.0464  |
| dCl_R          | Ca_R           | -0.31 | 0.0466  | Cl_R           | dCl_L          | -0.36 | 0.0192  |
| dCl_R          | d(CaR-CaL/CaR) | -0.33 | 0.0335  | Cl_R           | dCl_R          | 0.60  | <0.0001 |
| dCl_R          | dCa_R          | 0.43  | 0.0042  | Cl_R           | K_R            | 0.56  | 0.0001  |
| dCl_R          | Na_L           | -0.35 | 0.0232  | Cl_R           | N_L            | 0.52  | 0.0005  |
| FRDW           | (CaR-CaL/CaR)  | -0.33 | 0.0357  | Cl_R           | Na_R           | 0.58  | 0.0001  |
| FRDW           | Ca_L           | 0.46  | 0.0024  | d(CaR-CaL/CaR) | Ca_L           | 0.49  | 0.0009  |



|      |                |       |         |                |                |       |         |
|------|----------------|-------|---------|----------------|----------------|-------|---------|
| FRDW | N_L            | -0.35 | 0.0244  | d(CaR-CaL/CaR) | Fe_L           | 0.36  | 0.0198  |
| K_L  | K_R            | -0.39 | 0.012   | d(CaR-CaL/CaR) | K_R            | -0.40 | 0.0087  |
| N_L  | C_L            | -0.53 | 0.0004  | d(CIR-CIL/CIR) | (CaR-CaL/CaR)  | 0.46  | 0.002   |
| N_L  | Ca_R           | -0.35 | 0.0224  | d(CIR-CIL/CIR) | Ca_L           | -0.49 | 0.001   |
| N_L  | dCa_L          | -0.34 | 0.0269  | d(CIR-CIL/CIR) | d(CaR-CaL/CaR) | -0.56 | 0.0001  |
| N_L  | K_R            | 0.33  | 0.0327  | d(CIR-CIL/CIR) | dCa_L          | -0.41 | 0.0072  |
| N_L  | N_R            | -0.32 | 0.0399  | d(CIR-CIL/CIR) | dCa_R          | 0.60  | <0.0001 |
| N_L  | Na_R           | -0.38 | 0.0123  | d(CIR-CIL/CIR) | dCl_R          | 0.48  | 0.0012  |
| N_R  | (CaR-CaL/CaR)  | 0.47  | 0.0018  | d(CIR-CIL/CIR) | K_R            | 0.56  | 0.0001  |
| N_R  | Ca_R           | 0.62  | <0.0001 | d(CIR-CIL/CIR) | N_L            | 0.67  | <0.0001 |
| N_R  | d(CaR-CaL/CaR) | 0.35  | 0.0212  | d(CIR-CIL/CIR) | Na_L           | -0.56 | 0.0001  |
| N_R  | dCa_R          | -0.44 | 0.0039  | dCa_L          | Ca_L           | 0.64  | <0.0001 |
| N_R  | Na_R           | 0.40  | 0.0084  | dCa_L          | d(CaR-CaL/CaR) | 0.70  | <0.0001 |
| Na_L | Ca_R           | 0.31  | 0.0455  | dCa_L          | K_L            | 0.36  | 0.0203  |
| Na_L | K_R            | -0.34 | 0.0263  | dCa_L          | Na_R           | 0.34  | 0.0282  |
| TRDW | Ca_L           | 0.52  | 0.0008  | dCa_R          | Ca_L           | -0.40 | 0.0081  |
| TRDW | d(CIR-CIL/CIR) | -0.34 | 0.0294  | dCa_R          | d(CaR-CaL/CaR) | -0.80 | <0.0001 |
| TRDW | FRDW           | 0.82  | <0.0001 | dCa_R          | Fe_L           | -0.35 | 0.0213  |
| TRDW | K_R            | -0.45 | 0.0042  | dCa_R          | K_R            | 0.57  | 0.0001  |
| TRDW | N_L            | -0.50 | 0.0007  | dCa_R          | Na_L           | -0.45 | 0.0031  |
|      |                |       |         | dCl_L          | (CaR-CaL/CaR)  | -0.37 | 0.0168  |
|      |                |       |         | dCl_L          | Ca_L           | 0.39  | 0.0124  |
|      |                |       |         | dCl_L          | d(CaR-CaL/CaR) | 0.50  | 0.0007  |
|      |                |       |         | dCl_L          | d(CIR-CIL/CIR) | -0.83 | <0.0001 |
|      |                |       |         | dCl_L          | dCa_L          | 0.39  | 0.0108  |
|      |                |       |         | dCl_L          | dCa_R          | -0.46 | 0.0024  |
|      |                |       |         | dCl_L          | dCl_R          | -0.47 | 0.0018  |
|      |                |       |         | dCl_L          | K_R            | -0.45 | 0.0038  |

---

|       |                |       |         |
|-------|----------------|-------|---------|
| dCl_L | N_L            | -0.46 | 0.002   |
| dCl_L | Na_L           | 0.50  | 0.0015  |
| dCl_R | d(CaR-CaL/CaR) | -0.33 | 0.0335  |
| dCl_R | dCa_R          | 0.43  | 0.0042  |
| dCl_R | K_R            | 0.47  | 0.0015  |
| dCl_R | N_L            | 0.45  | 0.0027  |
| dCl_R | Na_L           | -0.42 | 0.006   |
| FRDW  | (CaR-CaL/CaR)  | -0.48 | 0.0011  |
| FRDW  | (CIR-CIL/CIR)  | -0.48 | 0.0012  |
| FRDW  | Ca_L           | 0.36  | 0.0179  |
| FRDW  | Ca_R           | -0.34 | 0.0266  |
| FRDW  | Cl_L           | 0.43  | 0.0041  |
| FRDW  | Cl_R           | -0.42 | 0.0058  |
| FRDW  | d(CIR-CIL/CIR) | -0.48 | 0.0015  |
| FRDW  | dCa_R          | -0.50 | 0.0008  |
| FRDW  | dCl_R          | -0.35 | 0.0246  |
| FRDW  | K_R            | -0.50 | 0.0008  |
| FRDW  | N_L            | -0.58 | 0.0001  |
| N_L   | (CaR-CaL/CaR)  | 0.34  | 0.0291  |
| N_L   | d(CaR-CaL/CaR) | -0.47 | 0.0015  |
| N_L   | dCa_R          | 0.53  | 0.0003  |
| N_L   | K_R            | 0.65  | <0.0001 |
| N_L   | Na_L           | -0.39 | 0.01    |
| N_R   | K_R            | 0.33  | 0.0303  |
| Na_L  | K_R            | -0.49 | 0.0017  |
| TRDW  | (CaR-CaL/CaR)  | -0.37 | 0.0172  |
| TRDW  | (CIR-CIL/CIR)  | -0.52 | 0.0005  |
| TRDW  | Cl_L           | 0.44  | 0.0051  |

---

|      |                |       |         |
|------|----------------|-------|---------|
| TRDW | Cl_R           | -0.53 | 0.0003  |
| TRDW | d(CIR-CIL/CIR) | -0.51 | 0.0005  |
| TRDW | dCa_R          | -0.48 | 0.0013  |
| TRDW | dCl_R          | -0.46 | 0.0021  |
| TRDW | FRDW           | 0.95  | <0.0001 |
| TRDW | K_R            | -0.55 | 0.0005  |
| TRDW | N_L            | -0.58 | 0.0001  |
| TRDW | Na_L           | 0.32  | 0.0423  |

**Table S5.** List of candidate genes (mRNA) that might be involved in leaf Cl<sup>-</sup> exclusion/accumulation at *LCl-6* downloaded from the *P. trifoliata* genome database at <https://phytozome.jgi.doe.gov> using markers 15R,750 and CR28,270. The starting physical position (in bp), description, and comparison(s) where differentially expressed genes (DEGs) have been detected, are provided. Comparisons 107\_15 vs 90\_15, and (107\_15 + 107\_0) vs (90\_15 + 90\_0) are coded as 2 and 3, respectively.

| mRNA              | start    | DEG in | Description                                                                                                 |
|-------------------|----------|--------|-------------------------------------------------------------------------------------------------------------|
| Ptrif.0006s0368.1 | 7872523  |        | K02575 - MFS transporter, NNP family, nitrate/nitrite transporter (NRT, narK, nrtP, nasA)                   |
| Ptrif.0006s0402.1 | 8525565  |        | PTHR10217//PTHR10217:SF494 - VOLTAGE AND LIGAND GATED POTASSIUM CHANNEL                                     |
| Ptrif.0006s0417.1 | 8818622  |        | PTHR19139//PTHR19139:SF167 - AQUAPORIN TRANSPORTER // AQUAPORIN PIP2-1-RELATED                              |
| Ptrif.0006s0418.2 | 8821986  | 3      | PTHR19139:SF167 - AQUAPORIN PIP2-1-RELATED                                                                  |
| Ptrif.0006s0419.1 | 8843501  |        | PTHR19139//PTHR19139:SF167 - AQUAPORIN TRANSPORTER // AQUAPORIN PIP2-1-RELATED                              |
| Ptrif.0006s0420.1 | 8850298  |        | K02152 - V-type H <sup>+</sup> -transporting ATPase subunit G (ATPeV1G, ATP6G)                              |
| Ptrif.0006s0539.1 | 10505139 | 3      | 3.6.3.29 - Molybdate-transporting ATPase                                                                    |
| Ptrif.0006s0540.2 | 10512840 | 3      | PTHR19241//PTHR19241:SF258 - ATP-BINDING CASSETTE TRANSPORTER // ABC TRANSPORTER G FAMILY MEMBER 17-RELATED |
| Ptrif.0006s0541.1 | 10535146 | 3      | PTHR19241//PTHR19241:SF258 - ATP-BINDING CASSETTE TRANSPORTER // ABC TRANSPORTER G FAMILY MEMBER 17-RELATED |
| Ptrif.0006s0601.1 | 11185093 | 3      | PTHR32468:SF10 - CATION/H(+) ANTIporter 20                                                                  |
| Ptrif.0006s0604.2 | 11267097 |        | PTHR32468:SF10 - CATION/H(+) ANTIporter 20                                                                  |
| Ptrif.0006s0606.2 | 11316426 |        | PTHR32468:SF10 - CATION/H(+) ANTIporter 20                                                                  |
| Ptrif.0006s0610.1 | 11359669 | 2, 3   | PTHR19444 - UNC-93 RELATED - Major facilitator superfamily protein                                          |
| Ptrif.0006s0696.2 | 12305174 | 2, 3   | K07300 - Ca <sup>2+</sup> :H <sup>+</sup> antiporter (chaA, CAX)                                            |
| Ptrif.0006s0734.1 | 12658870 |        | PTHR11654//PTHR11654:SF181 - OLIGOPEPTIDE TRANSPORTER-RELATED // PROTEIN NRT1/ PTR FAMILY 2.8 (NPF2.3)      |
| Ptrif.0006s2462.1 | 12728591 | 3      | PTHR11654:SF79 - PROTEIN NRT1/ PTR FAMILY 5.5-RELATED (NPF5.12)                                             |
| Ptrif.0006s0803.2 | 13122768 |        | PTHR11662//PTHR11662:SF235 - SODIUM-DEPENDENT PHOSPHATE TRANSPORTERS // ANION TRANSPORTER 3                 |
| Ptrif.0006s0814.5 | 13277480 | 3      | PTHR11654//PTHR11654:SF125 - OLIGOPEPTIDE TRANSPORTER-RELATED (NPF8.1)                                      |
| Ptrif.0006s0815.1 | 13284465 | 3      | PTHR11654//PTHR11654:SF125 - OLIGOPEPTIDE TRANSPORTER-RELATED (NPF8.2)                                      |
| Ptrif.0006s0823.1 | 13354423 | 2, 3   | PTHR11654:SF79 - PROTEIN NRT1/ PTR FAMILY 5.5-RELATED (NPF5.9)                                              |
| Ptrif.0006s0824.1 | 13368702 |        | K14638 - solute carrier family 15 (peptide/histidine transporter) (NPF5.8)                                  |
| Ptrif.0006s2370.1 | 13372277 |        | PTHR11654:SF79 - PROTEIN NRT1/ PTR FAMILY 5.5-RELATED (NPF5.10)                                             |
| Ptrif.0006s0828.1 | 13400568 |        | PTHR19139//PTHR19139:SF169 - AQUAPORIN TRANSPORTER // AQUAPORIN PIP1-4-RELATED                              |

**Table S6.** Summary of raw, clean and mapped reads by library, including the full-sib and NaCl concentrations used.

| Library          | Full-sib | NaCl<br>(mM) | Raw reads | Clean reads |       | Mapping (%)          |                      |
|------------------|----------|--------------|-----------|-------------|-------|----------------------|----------------------|
|                  |          |              |           | Amount      | %     | <i>C. clementina</i> | <i>P. trifoliata</i> |
| NGS083-20-1_S1   | 107      | 0            | 12943104  | 10946681    | 84,58 | 84,60                | 69,12                |
| NGS083-20-2_S2   | 107      | 0            | 11786382  | 9975424     | 84,64 | 85,30                | 71,41                |
| NGS083-20-3_S3   | 107      | 0            | 12716482  | 10781816    | 84,79 | 84,23                | 69,00                |
| NGS083-20-4_S4   | 90       | 0            | 10831538  | 9102085     | 84,03 | 79,50                | 61,25                |
| NGS083-20-5_S5   | 90       | 0            | 11304859  | 9596465     | 84,89 | 84,40                | 68,19                |
| NGS083-20-6_S6   | 90       | 0            | 12355784  | 10484140    | 84,85 | 83,18                | 67,30                |
| NGS083-20-7_S7   | 107      | 15           | 11227180  | 9486618     | 84,50 | 83,94                | 68,49                |
| NGS083-20-8_S8   | 107      | 15           | 12247759  | 10352414    | 84,52 | 84,82                | 70,48                |
| NGS083-20-9_S9   | 107      | 15           | 11723647  | 9889443     | 84,35 | 83,97                | 69,38                |
| NGS083-20-10_S10 | 90       | 15           | 12244396  | 10294030    | 84,07 | 84,66                | 69,92                |
| NGS083-20-11_S11 | 90       | 15           | 11904751  | 9826470     | 82,54 | 84,63                | 69,87                |
| NGS083-20-12_S12 | 90       | 15           | 12886702  | 10831352    | 84,05 | 83,50                | 69,16                |

**Table S7.** List of DEGs in *LCl-6* coded by expressed sequence (ESR) and transcript (mRNA), using the *C. clementina* genome as reference, per comparison. Information on gene physical position (start), fold change expression (logFC), adjusted *p* value, and annotation, when known, is provided.

| Comparison                         | ESRs     | mRNA            | logFC  | padj  | Start    | Candi-date | Anotation                                        |
|------------------------------------|----------|-----------------|--------|-------|----------|------------|--------------------------------------------------|
| (107-15 + 107-0) vs (90-15 + 90-0) | ESR42000 | Ciclev10013303m | -1.566 | 0.066 | 10032778 |            |                                                  |
| (107-15 + 107-0) vs (90-15 + 90-0) | ESR42011 | Ciclev10012331m | -1.442 | 0.023 | 10082734 |            | chloroplast RNA-binding protein 29               |
| (107-15 + 107-0) vs (90-15 + 90-0) | ESR42010 | Ciclev10012331m | -1.301 | 0.020 | 10082734 |            | chloroplast RNA-binding protein 29               |
| (107-15 + 107-0) vs (90-15 + 90-0) | ESR42008 | Ciclev10012331m | -1.272 | 0.052 | 10082734 |            | chloroplast RNA-binding protein 29               |
| (107-15 + 107-0) vs (90-15 + 90-0) | ESR42009 | Ciclev10012331m | -1.393 | 0.032 | 10082734 |            | chloroplast RNA-binding protein 29               |
| (107-15 + 107-0) vs (90-15 + 90-0) | ESR42007 | Ciclev10012331m | -1.177 | 0.030 | 10082734 |            | chloroplast RNA-binding protein 29               |
| (107-15 + 107-0) vs (90-15 + 90-0) | ESR42028 | Ciclev10012375m | 2.153  | 0.020 | 10419232 | PIP2-1     | plasma membrane intrinsic protein 2              |
| (107-15 + 107-0) vs (90-15 + 90-0) | ESR42033 | Ciclev10011116m | 2.210  | 0.063 | 10438273 |            | CRINKLY4 related 1                               |
| (107-15 + 107-0) vs (90-15 + 90-0) | ESR42034 | Ciclev10013160m | -2.043 | 0.005 | 10448885 |            |                                                  |
| 107-0 vs 90-0                      | ESR42034 | Ciclev10013160m | -1.393 | 0.039 | 10448885 |            |                                                  |
| (107-15 + 107-0) vs (90-15 + 90-0) | ESR42035 | Ciclev10013919m | -1.721 | 0.052 | 10451057 |            | Protein kinase superfamily protein               |
| (107-15 + 107-0) vs (90-15 + 90-0) | ESR42044 | Ciclev10012588m | 3.432  | 0.052 | 10597545 |            | FASCICLIN-like arabinogalactan-protein 11        |
| (107-15 + 107-0) vs (90-15 + 90-0) | ESR42066 | Ciclev10012170m | 1.199  | 0.093 | 11043782 |            | Peroxidase superfamily protein                   |
| (107-15 + 107-0) vs (90-15 + 90-0) | ESR42073 | Ciclev10012558m | 1.102  | 0.081 | 11112519 |            |                                                  |
| (107-15 + 107-0) vs (90-15 + 90-0) | ESR42081 | Ciclev10011171m | 4.390  | 0.068 | 11177534 |            | Leucine-rich repeat receptor-like protein kinase |
| (107-15 + 107-0) vs (90-15 + 90-0) | ESR42096 | Ciclev10012036m | 3.305  | 0.091 | 11374942 |            | Nucleotide-diphospho-sugar transferases          |
| (107-15 + 107-0) vs (90-15 + 90-0) | ESR42097 | Ciclev10011643m | 2.612  | 0.045 | 11401278 |            | IQ-domain 2                                      |
| (107-15 + 107-0) vs (90-15 + 90-0) | ESR42098 | Ciclev10011643m | 2.741  | 0.037 | 11401278 |            | IQ-domain 2                                      |
| (107-15 + 107-0) vs (90-15 + 90-0) | ESR42117 | Ciclev10013573m | 2.951  | 0.088 | 11554084 |            | minichromosome maintenance 8                     |
| 107-0 vs 90-0                      | ESR42117 | Ciclev10013573m | 2.803  | 0.089 | 11554084 |            | minichromosome maintenance 8                     |
| (107-15 + 107-0) vs (90-15 + 90-0) | ESR42136 | Ciclev10013509m | -4.695 | 0.052 | 11734007 |            | target of early activation tagged (EAT) 2        |
| (107-15 + 107-0) vs (90-15 + 90-0) | ESR42159 | Ciclev10011660m | 0.994  | 0.037 | 11954097 |            | WRKY family transcription factor family protein  |
| (107-15 + 107-0) vs (90-15 + 90-0) | ESR42165 | Ciclev10012291m | -1.337 | 0.016 | 12023785 |            | ubiquitin 4                                      |
| (107-15 + 107-0) vs (90-15 + 90-0) | ESR42179 | Ciclev10011952m | -1.131 | 0.079 | 12224206 |            | integral membrane TerC family protein            |

|                                    |          |                 |        |       |          |         |                                              |
|------------------------------------|----------|-----------------|--------|-------|----------|---------|----------------------------------------------|
| (107-15 + 107-0) vs (90-15 + 90-0) | ESR42191 | Ciclev10012410m | 3.830  | 0.054 | 12270372 |         | RING/U-box superfamily protein               |
| (107-15 + 107-0) vs (90-15 + 90-0) | ESR42210 | Ciclev10013542m | 3.253  | 0.094 | 12407037 |         | O-methyltransferase 1                        |
| (107-15 + 107-0) vs (90-15 + 90-0) | ESR42211 | Ciclev10011291m | 4.015  | 0.003 | 12440026 |         | Fatty acid hydroxylase superfamily           |
| 107-0 vs 90-0                      | ESR42211 | Ciclev10011291m | 1.746  | 0.089 | 12440026 |         | Fatty acid hydroxylase superfamily           |
| 107-15 vs 90-15                    | ESR42211 | Ciclev10011291m | 2.268  | 0.038 | 12440026 |         | Fatty acid hydroxylase superfamily           |
| (107-15 + 107-0) vs (90-15 + 90-0) | ESR42213 | Ciclev10013485m | 3.770  | 0.075 | 12469611 | ABCG-17 | ABC-2 type transporter family protein        |
| (107-15 + 107-0) vs (90-15 + 90-0) | ESR42214 | Ciclev10011167m | 1.795  | 0.030 | 12478048 | ABCG-17 | ABC-2 type transporter family protein        |
| (107-15 + 107-0) vs (90-15 + 90-0) | ESR42215 | Ciclev10011147m | 2.226  | 0.054 | 12497442 | ABCG-17 | ABC-2 type transporter family protein        |
| (107-15 + 107-0) vs (90-15 + 90-0) | ESR42216 | Ciclev10010954m | 0.808  | 0.075 | 12508551 |         | endomembrane-type CA-ATPase 4                |
| (107-15 + 107-0) vs (90-15 + 90-0) | ESR42218 | Ciclev10011715m | -2.919 | 0.001 | 12551908 |         | HXXXD-type acyl-transferase family protein   |
| 107-0 vs 90-0                      | ESR42218 | Ciclev10011715m | -1.419 | 0.050 | 12551908 |         | HXXXD-type acyl-transferase family protein   |
| 107-15 vs 90-15                    | ESR42218 | Ciclev10011715m | -1.500 | 0.029 | 12551908 |         | HXXXD-type acyl-transferase family protein   |
| (107-15 + 107-0) vs (90-15 + 90-0) | ESR42219 | Ciclev10012982m | 5.110  | 0.054 | 12558711 |         |                                              |
| (107-15 + 107-0) vs (90-15 + 90-0) | ESR42230 | Ciclev10013809m | -3.548 | 0.094 | 12694282 |         | Ankyrin repeat family protein                |
| (107-15 + 107-0) vs (90-15 + 90-0) | ESR42232 | Ciclev10011951m | -1.376 | 0.037 | 12700076 |         | Pectin lyase-like superfamily protein        |
| (107-15 + 107-0) vs (90-15 + 90-0) | ESR42242 | Ciclev10012060m | -1.030 | 0.018 | 12883561 |         | Tetratricopeptide repeat (TPR)-like protein  |
| (107-15 + 107-0) vs (90-15 + 90-0) | ESR42249 | Ciclev10010956m | 2.866  | 0.088 | 12916688 |         | ATP binding microtubule motor family protein |
| (107-15 + 107-0) vs (90-15 + 90-0) | ESR42257 | Ciclev10012723m | -1.234 | 0.052 | 13032633 |         | pyrophosphorylase 4                          |
| (107-15 + 107-0) vs (90-15 + 90-0) | ESR42258 | Ciclev10012723m | -1.308 | 0.048 | 13032633 |         | pyrophosphorylase 4                          |
| (107-15 + 107-0) vs (90-15 + 90-0) | ESR42262 | Ciclev10013673m | -0.914 | 0.088 | 13071301 |         |                                              |
| (107-15 + 107-0) vs (90-15 + 90-0) | ESR42270 | Ciclev10012475m | -0.839 | 0.095 | 13208438 |         |                                              |
| (107-15 + 107-0) vs (90-15 + 90-0) | ESR42280 | Ciclev10011060m | 1.426  | 0.097 | 13305253 |         | cation/H <sup>+</sup> exchanger 20           |
| (107-15 + 107-0) vs (90-15 + 90-0) | ESR42288 | Ciclev10013572m | 4.029  | 0.063 | 13444058 |         |                                              |
| (107-15 + 107-0) vs (90-15 + 90-0) | ESR42290 | Ciclev10011745m | 2.067  | 0.001 | 13446344 | MFS     | Major facilitator superfamily protein        |
| (107-15 + 107-0) vs (90-15 + 90-0) | ESR42291 | Ciclev10011745m | 1.679  | 0.001 | 13446344 | MFS     | Major facilitator superfamily protein        |

|                                    |          |                 |        |       |          |     |                                                          |
|------------------------------------|----------|-----------------|--------|-------|----------|-----|----------------------------------------------------------|
| (107-15 + 107-0) vs (90-15 + 90-0) | ESR42289 | Ciclev10011745m | 1.864  | 0.003 | 13446344 | MFS | Major facilitator superfamily protein                    |
| 107-0 vs 90-0                      | ESR42290 | Ciclev10011745m | 0.872  | 0.089 | 13446344 | MFS | Major facilitator superfamily protein                    |
| 107-0 vs 90-0                      | ESR42291 | Ciclev10011745m | 0.793  | 0.067 | 13446344 | MFS | Major facilitator superfamily protein                    |
| 107-15 vs 90-15                    | ESR42290 | Ciclev10011745m | 1.195  | 0.029 | 13446344 | MFS | Major facilitator superfamily protein                    |
| 107-15 vs 90-15                    | ESR42291 | Ciclev10011745m | 0.886  | 0.038 | 13446344 | MFS | Major facilitator superfamily protein                    |
| 107-15 vs 90-15                    | ESR42289 | Ciclev10011745m | 1.214  | 0.029 | 13446344 | MFS | Major facilitator superfamily protein                    |
| (107-15 + 107-0) vs (90-15 + 90-0) | ESR42293 | Ciclev10013882m | 3.598  | 0.088 | 13489604 |     | NAD(P)-binding Rossmann-fold superfamily protein         |
| (107-15 + 107-0) vs (90-15 + 90-0) | ESR42295 | Ciclev10012849m | -0.805 | 0.075 | 13498177 |     | Ribosomal protein L12                                    |
| (107-15 + 107-0) vs (90-15 + 90-0) | ESR42312 | Ciclev10013628m | 2.304  | 0.067 | 13645123 |     | Transducin/WD40 repeat-like superfamily protein          |
| (107-15 + 107-0) vs (90-15 + 90-0) | ESR42320 | Ciclev10013810m | -1.591 | 0.068 | 13745347 |     | Protein of unknown function (DUF3741)                    |
| (107-15 + 107-0) vs (90-15 + 90-0) | ESR42330 | Ciclev10012089m | -1.685 | 0.001 | 14087181 |     | myb-like HTH transcriptional regulator                   |
| 107-0 vs 90-0                      | ESR42330 | Ciclev10012089m | -1.056 | 0.025 | 14087181 |     | myb-like HTH transcriptional regulator                   |
| (107-15 + 107-0) vs (90-15 + 90-0) | ESR42348 | Ciclev10012381m | -1.476 | 0.052 | 14277934 |     |                                                          |
| (107-15 + 107-0) vs (90-15 + 90-0) | ESR42346 | Ciclev10012381m | -1.791 | 0.037 | 14277934 |     |                                                          |
| (107-15 + 107-0) vs (90-15 + 90-0) | ESR42368 | Ciclev10013090m | 1.293  | 0.037 | 14397047 |     |                                                          |
| (107-15 + 107-0) vs (90-15 + 90-0) | ESR42374 | Ciclev10011334m | 1.446  | 0.096 | 14451669 |     | Pathogenesis-related thaumatin protein                   |
| (107-15 + 107-0) vs (90-15 + 90-0) | ESR42375 | Ciclev10011734m | -0.839 | 0.052 | 14472657 |     | Tetratricopeptide repeat (TPR)-like y protein            |
| (107-15 + 107-0) vs (90-15 + 90-0) | ESR42382 | Ciclev10013799m | 1.320  | 0.052 | 14498799 |     | Concanavalin A-like lectin protein kinase family protein |
| (107-15 + 107-0) vs (90-15 + 90-0) | ESR42385 | Ciclev10011508m | 3.325  | 0.052 | 14524326 |     | Protein of unknown function (DUF604)                     |
| (107-15 + 107-0) vs (90-15 + 90-0) | ESR42394 | Ciclev10012494m | -3.160 | 0.007 | 14604868 |     | NAD(P)-binding Rossmann-fold superfamily protein         |
| 107-0 vs 90-0                      | ESR42394 | Ciclev10012494m | -2.017 | 0.050 | 14604868 |     | NAD(P)-binding Rossmann-fold superfamily protein         |
| (107-15 + 107-0) vs (90-15 + 90-0) | ESR42395 | Ciclev10012221m | -2.130 | 0.088 | 14625884 |     | NAD(P)-binding Rossmann-fold superfamily protein         |
| (107-15 + 107-0) vs (90-15 + 90-0) | ESR42406 | Ciclev10011164m | 1.694  | 0.037 | 14694513 |     | basic helix-loop-helix (bHLH) DNA-binding prot.          |
| (107-15 + 107-0) vs (90-15 + 90-0) | ESR42407 | Ciclev10013212m | 3.506  | 0.004 | 14721970 |     |                                                          |
| 107-0 vs 90-0                      | ESR42407 | Ciclev10013212m | 1.974  | 0.050 | 14721970 |     |                                                          |
| (107-15 + 107-0) vs (90-15 + 90-0) | ESR42413 | Ciclev10012040m | -1.437 | 0.007 | 14754810 |     | Glucose-1-phosphate adenyltransferase prot.              |
| (107-15 + 107-0) vs (90-15 + 90-0) | ESR42412 | Ciclev10012040m | -1.057 | 0.063 | 14754810 |     | Glucose-1-phosphate adenyltransferase prot.              |
| 107-0 vs 90-0                      | ESR42412 | Ciclev10012040m | -0.895 | 0.089 | 14754810 |     | Glucose-1-phosphate adenyltransferase prot.              |



|                                    |                 |                 |               |       |          |                |                                                   |
|------------------------------------|-----------------|-----------------|---------------|-------|----------|----------------|---------------------------------------------------|
| (107-15 + 107-0) vs (90-15 + 90-0) | ESR42418        | Ciclev10012242m | 2.582         | 0.005 | 14770122 |                | NAD(P)-linked oxidoreductase superfamily protein  |
| (107-15 + 107-0) vs (90-15 + 90-0) | ESR42417        | Ciclev10012242m | 1.734         | 0.068 | 14770122 |                | NAD(P)-linked oxidoreductase superfamily protein  |
| <b>107-15 vs 90-15</b>             | <b>ESR42418</b> | Ciclev10012242m | 1.804         | 0.029 | 14770122 |                | NAD(P)-linked oxidoreductase superfamily protein  |
| (107-15 + 107-0) vs (90-15 + 90-0) | ESR42443        | Ciclev10010967m | <b>-3.057</b> | 0.020 | 14988237 |                | Leucine-rich repeat protein kinase family protein |
| <b>107-0 vs 90-0</b>               | <b>ESR42443</b> | Ciclev10010967m | <b>-1.953</b> | 0.089 | 14988237 |                | Leucine-rich repeat protein kinase family protein |
| (107-15 + 107-0) vs (90-15 + 90-0) | ESR42454        | Ciclev10011268m | 0.887         | 0.067 | 15070590 |                | POX (plant homeobox) family protein               |
| (107-15 + 107-0) vs (90-15 + 90-0) | ESR42456        | Ciclev10011341m | <b>-1.311</b> | 0.011 | 15116860 | NPF5.12        | Major facilitator superfamily protein             |
| <b>107-0 vs 90-0</b>               | <b>ESR42456</b> | Ciclev10011341m | <b>-0.810</b> | 0.089 | 15116860 | <b>NPF5.12</b> | Major facilitator superfamily protein             |
| (107-15 + 107-0) vs (90-15 + 90-0) | ESR42462        | Ciclev10013234m | <b>-1.847</b> | 0.048 | 15151156 |                |                                                   |
| <b>107-0 vs 90-0</b>               | <b>ESR42462</b> | Ciclev10013234m | <b>-1.432</b> | 0.089 | 15151156 |                |                                                   |
| (107-15 + 107-0) vs (90-15 + 90-0) | ESR42470        | Ciclev10013132m | 3.992         | 0.001 | 15164058 |                | Bifunctional inhibitor/lipid-transfer protein     |
| <b>107-0 vs 90-0</b>               | <b>ESR42470</b> | Ciclev10013132m | 1.706         | 0.060 | 15164058 |                | Bifunctional inhibitor/lipid-transfer protein     |
| <b>107-15 vs 90-15</b>             | <b>ESR42470</b> | Ciclev10013132m | 2.286         | 0.029 | 15164058 |                | Bifunctional inhibitor/lipid-transfer protein     |
| (107-15 + 107-0) vs (90-15 + 90-0) | ESR42487        | Ciclev10012250m | <b>-1.145</b> | 0.039 | 15275665 |                | Arabidopsis Inositol phosphorylceramide Synthase1 |
| (107-15 + 107-0) vs (90-15 + 90-0) | ESR42494        | Ciclev10011384m | 1.500         | 0.063 | 15311565 |                | laccase 7                                         |
| (107-15 + 107-0) vs (90-15 + 90-0) | ESR42498        | Ciclev10011375m | 3.116         | 0.016 | 15354935 |                | laccase 7                                         |
| <b>107-0 vs 90-0</b>               | <b>ESR42498</b> | Ciclev10011375m | 1.898         | 0.089 | 15354935 |                | laccase 7                                         |
| (107-15 + 107-0) vs (90-15 + 90-0) | ESR42500        | Ciclev10012045m | 2.052         | 0.053 | 15377566 |                | Concanavalin A-like lectin family protein         |
| (107-15 + 107-0) vs (90-15 + 90-0) | ESR42505        | Ciclev10011279m | 2.927         | 0.016 | 15404434 |                | O-fucosyltransferase family protein               |
| <b>107-0 vs 90-0</b>               | <b>ESR42505</b> | Ciclev10011279m | 1.803         | 0.091 | 15404434 |                | O-fucosyltransferase family protein               |
| (107-15 + 107-0) vs (90-15 + 90-0) | ESR42515        | Ciclev10012753m | 1.259         | 0.088 | 15443543 |                | Reticulon family protein                          |
| (107-15 + 107-0) vs (90-15 + 90-0) | ESR42530        | Ciclev10013166m | <b>-1.233</b> | 0.039 | 15537914 |                | Protein of unknown function (DUF962)              |
| (107-15 + 107-0) vs (90-15 + 90-0) | ESR42534        | Ciclev10013252m | 5.059         | 0.013 | 15548237 |                |                                                   |
| <b>107-0 vs 90-0</b>               | <b>ESR42534</b> | Ciclev10013252m | 3.476         | 0.067 | 15548237 |                |                                                   |
| (107-15 + 107-0) vs (90-15 + 90-0) | ESR42535        | Ciclev10012894m | 3.209         | 0.052 | 15553485 |                |                                                   |
| (107-15 + 107-0) vs (90-15 + 90-0) | ESR42542        | Ciclev10011239m | 1.831         | 0.068 | 15703559 |                | Protein of unknown function (DUF740)              |
| (107-15 + 107-0) vs (90-15 + 90-0) | ESR42547        | Ciclev10011381m | 2.177         | 0.005 | 15747188 | NPF8.1         | peptide transporter 1                             |

|                                    |          |                 |        |       |          |        |                                                     |
|------------------------------------|----------|-----------------|--------|-------|----------|--------|-----------------------------------------------------|
| (107-15 + 107-0) vs (90-15 + 90-0) | ESR42546 | Ciclev10011381m | 2.424  | 0.001 | 15747188 | NPF8.1 | peptide transporter 1                               |
| 107-0 vs 90-0                      | ESR42547 | Ciclev10011381m | 1.460  | 0.050 | 15747188 | NPF8.1 | peptide transporter 1                               |
| 107-0 vs 90-0                      | ESR42546 | Ciclev10011381m | 1.407  | 0.025 | 15747188 | NPF8.1 | peptide transporter 1                               |
| (107-15 + 107-0) vs (90-15 + 90-0) | ESR42548 | Ciclev10013821m | 6.813  | 0.088 | 15754314 | NPF8.2 | peptide transporter 1                               |
| (107-15 + 107-0) vs (90-15 + 90-0) | ESR42549 | Ciclev10011400m | 3.506  | 0.076 | 15761841 |        | Laccase/Diphenol oxidase family protein             |
| (107-15 + 107-0) vs (90-15 + 90-0) | ESR42550 | Ciclev10012285m | 1.893  | 0.005 | 15774976 |        | Duplicated homeodomain-like superfamily protein     |
| 107-0 vs 90-0                      | ESR42550 | Ciclev10012285m | 1.129  | 0.060 | 15774976 |        | Duplicated homeodomain-like superfamily protein     |
| (107-15 + 107-0) vs (90-15 + 90-0) | ESR42558 | Ciclev10013337m | 7.755  | 0.003 | 15843855 | NPF5.9 | proton-dependent oligopeptide transport (POT) prot. |
| 107-0 vs 90-0                      | ESR42558 | Ciclev10013337m | 3.478  | 0.060 | 15843855 | NPF5.9 | proton-dependent oligopeptide transport (POT) prot. |
| 107-15 vs 90-15                    | ESR42558 | Ciclev10013337m | 4.277  | 0.038 | 15843855 | NPF5.9 | proton-dependent oligopeptide transport (POT) prot. |
| (107-15 + 107-0) vs (90-15 + 90-0) | ESR42562 | Ciclev10011536m | 2.170  | 0.054 | 15879061 |        | glycerol-3-phosphate acyltransferase 6              |
| (107-15 + 107-0) vs (90-15 + 90-0) | ESR42573 | Ciclev10013652m | -1.546 | 0.016 | 16023582 |        | Leucine-rich repeat protein kinase family protein   |
| (107-15 + 107-0) vs (90-15 + 90-0) | ESR42577 | Ciclev10013537m | -3.982 | 0.063 | 16084538 |        | Leucine-rich repeat protein kinase family protein   |
| (107-15 + 107-0) vs (90-15 + 90-0) | ESR42581 | Ciclev10011409m | -0.975 | 0.057 | 16154922 |        | Carbohydrate-binding-like fold                      |
| (107-15 + 107-0) vs (90-15 + 90-0) | ESR42583 | Ciclev10011409m | -1.160 | 0.052 | 16154922 |        | Carbohydrate-binding-like fold                      |
| (107-15 + 107-0) vs (90-15 + 90-0) | ESR42596 | Ciclev10012370m | 2.692  | 0.053 | 16218093 |        | light harvesting complex photosystem II             |
| (107-15 + 107-0) vs (90-15 + 90-0) | ESR42597 | Ciclev10012370m | 2.112  | 0.039 | 16218093 |        | light harvesting complex photosystem II             |

**Table S8.** List of DEGs in *LCl-6* coded by transcript (mRNA), using the *P. trifoliata* genome as reference, per comparison. Information on the *C. clementina* (Ccl) orthologue, gene physical position (start), fold change expression (logFC), adjusted *p* value, and annotation, when known, is provided for each entry.

| Comparison                         | mRNA              | Ccl             | logFC  | padj  | Start    | Candidate | Anotation                                                             |
|------------------------------------|-------------------|-----------------|--------|-------|----------|-----------|-----------------------------------------------------------------------|
| (107-15 + 107-0) vs (90-15 + 90-0) | Ptrif.0006s0373.1 | Ciclev10013664m | 4.954  | 0.031 | 7953229  |           |                                                                       |
| (107-15 + 107-0) vs (90-15 + 90-0) | Ptrif.0006s0379.1 | Ciclev10012754m | -1.081 | 0.069 | 8195685  |           | TCP family transcription factor                                       |
| (107-15 + 107-0) vs (90-15 + 90-0) | Ptrif.0006s0399.1 |                 | -6.102 | 0.006 | 8509586  |           | DNase I-like superfamily protein                                      |
| 107-15 vs 90-15                    | Ptrif.0006s0399.1 |                 | -4.188 | 0.023 | 8509586  |           | DNase I-like superfamily protein                                      |
| (107-15 + 107-0) vs (90-15 + 90-0) | Ptrif.0006s2324.1 | Ciclev10012331m | -1.404 | 0.022 | 8518847  |           | RNA-binding (RRM/RBD/RNP motifs) family protein                       |
| (107-15 + 107-0) vs (90-15 + 90-0) | Ptrif.0006s0418.2 | Ciclev10012379m | 1.565  | 0.085 | 8821986  | PIP2-1    |                                                                       |
| (107-15 + 107-0) vs (90-15 + 90-0) | Ptrif.0006s0421.1 | Ciclev10011116m | 2.263  | 0.055 | 8860889  |           | CRINKLY4 related 1                                                    |
| (107-15 + 107-0) vs (90-15 + 90-0) | Ptrif.0006s0422.1 | Ciclev10013919m | -1.828 | 0.007 | 8869539  |           |                                                                       |
| (107-15 + 107-0) vs (90-15 + 90-0) | Ptrif.0006s0428.1 | Ciclev10012588m | 3.412  | 0.055 | 8990818  |           | FASCICLIN-like arabinogalactan-protein 11                             |
| (107-15 + 107-0) vs (90-15 + 90-0) | Ptrif.0006s0466.1 | Ciclev10012036m | 3.357  | 0.085 | 9519455  |           | Nucleotide-diphospho-sugar transferases superfamily protein           |
| (107-15 + 107-0) vs (90-15 + 90-0) | Ptrif.0006s0469.1 | Ciclev10011643m | 2.592  | 0.035 | 9555113  |           | IQ-domain 2                                                           |
| (107-15 + 107-0) vs (90-15 + 90-0) | Ptrif.0006s0480.1 | Ciclev10013573m | 2.841  | 0.086 | 9682256  |           | minichromosome maintenance 8                                          |
| (107-15 + 107-0) vs (90-15 + 90-0) | Ptrif.0006s0504.1 | Ciclev10011660m | 0.862  | 0.091 | 10007630 |           | WRKY family transcription factor family protein                       |
| (107-15 + 107-0) vs (90-15 + 90-0) | Ptrif.0006s0507.1 | Ciclev10032010m | 1.147  | 0.042 | 10041155 |           | F-box family protein                                                  |
| (107-15 + 107-0) vs (90-15 + 90-0) | Ptrif.0006s0512.1 | Ciclev10012631m | -1.189 | 0.034 | 10206685 |           | Glutathione S-transferase family protein                              |
| (107-15 + 107-0) vs (90-15 + 90-0) | Ptrif.0006s0518.1 | Ciclev10012410m | 3.915  | 0.041 | 10262904 |           | RING/U-box superfamily protein                                        |
| (107-15 + 107-0) vs (90-15 + 90-0) | Ptrif.0006s0530.1 | Ciclev10012844m | -2.153 | 0.034 | 10344501 |           | (1 of 1) PF03692 - Putative zinc- or iron-chelating domain (CxxCxxCC) |
| (107-15 + 107-0) vs (90-15 + 90-0) | Ptrif.0006s0536.1 | Ciclev10011291m | 3.455  | 0.006 | 10455554 |           | Fatty acid hydroxylase superfamily                                    |
| 107-15 vs 90-15                    | Ptrif.0006s0536.1 | Ciclev10011291m | 2.036  | 0.067 | 10455554 |           | Fatty acid hydroxylase superfamily                                    |
| (107-15 + 107-0) vs (90-15 + 90-0) | Ptrif.0006s0537.1 | Ciclev10011291m | 7.442  | 0.007 | 10467974 |           | Fatty acid hydroxylase superfamily                                    |
| (107-15 + 107-0) vs (90-15 + 90-0) | Ptrif.0006s0539.1 | Ciclev10013485m | 3.748  | 0.070 | 10505139 |           |                                                                       |
| (107-15 + 107-0) vs (90-15 + 90-0) | Ptrif.0006s0540.2 | Ciclev10011167m | 1.624  | 0.036 | 10512840 | ABCG      |                                                                       |
| (107-15 + 107-0) vs (90-15 + 90-0) | Ptrif.0006s0541.1 | Ciclev10011147m | 2.104  | 0.057 | 10535146 | ABCG      | ABC-2 type transporter family protein                                 |
| (107-15 + 107-0) vs (90-15 + 90-0) | Ptrif.0006s2342.1 | Ciclev10011715m | -2.711 | 0.003 | 10578628 |           | HXXXD-type acyl-transferase family protein                            |
| 107-15 vs 90-15                    | Ptrif.0006s2342.1 | Ciclev10011715m | -1.442 | 0.043 | 10578628 |           | HXXXD-type acyl-transferase family protein                            |

|                                    |                   |                 |               |       |          |     |                                                          |
|------------------------------------|-------------------|-----------------|---------------|-------|----------|-----|----------------------------------------------------------|
| (107-15 + 107-0) vs (90-15 + 90-0) | Ptrif.0006s0553.1 | Ciclev10013809m | <b>-3.586</b> | 0.088 | 10706645 |     |                                                          |
| (107-15 + 107-0) vs (90-15 + 90-0) | Ptrif.0006s0554.1 | Ciclev10011951m | <b>-1.260</b> | 0.057 | 10712358 |     |                                                          |
| (107-15 + 107-0) vs (90-15 + 90-0) | Ptrif.0006s0567.2 | Ciclev10012060m | <b>-1.160</b> | 0.010 | 10892531 |     | Tetratricopeptide repeat (TPR)-like superfamily protein  |
| (107-15 + 107-0) vs (90-15 + 90-0) | Ptrif.0006s0572.2 | Ciclev10010956m | 2.907         | 0.078 | 10919502 |     | ATP binding microtubule motor family protein             |
| (107-15 + 107-0) vs (90-15 + 90-0) | Ptrif.0006s0579.1 | Ciclev10012723m | <b>-1.099</b> | 0.098 | 11003559 |     | pyrophosphorylase 4                                      |
| (107-15 + 107-0) vs (90-15 + 90-0) | Ptrif.0006s0593.1 | Ciclev10012475m | <b>-0.897</b> | 0.052 | 11128891 |     |                                                          |
| (107-15 + 107-0) vs (90-15 + 90-0) | Ptrif.0006s0601.1 | Ciclev10011060m | 1.357         | 0.090 | 11185093 |     | cation/H+ exchanger 20                                   |
| (107-15 + 107-0) vs (90-15 + 90-0) | Ptrif.0006s2350.1 | Ciclev10014295m | <b>-7.338</b> | 0.006 | 11341441 |     |                                                          |
| (107-15 + 107-0) vs (90-15 + 90-0) | Ptrif.0006s0610.1 | Ciclev10011745m | 1.769         | 0.003 | 11359669 | MFS | Major facilitator superfamily protein                    |
| <b>107-15 vs 90-15</b>             | Ptrif.0006s0610.1 | Ciclev10011745m | 1.071         | 0.023 | 11359669 | MFS | Major facilitator superfamily protein                    |
| (107-15 + 107-0) vs (90-15 + 90-0) | Ptrif.0006s0626.1 | Ciclev10013628m | 1.965         | 0.092 | 11522906 |     | Transducin/WD40 repeat-like superfamily protein          |
| (107-15 + 107-0) vs (90-15 + 90-0) | Ptrif.0006s0635.1 | Ciclev10013810m | <b>-1.701</b> | 0.065 | 11632478 |     | Protein of unknown function (DUF3741)                    |
| (107-15 + 107-0) vs (90-15 + 90-0) | Ptrif.0006s0649.2 | Ciclev10012089m | <b>-1.792</b> | 0.003 | 11913993 |     | myb-like HTH transcriptional regulator family protein    |
| <b>107-0 vs 90-0</b>               | Ptrif.0006s0649.2 | Ciclev10012089m | <b>-1.093</b> | 0.072 | 11913993 |     | myb-like HTH transcriptional regulator family protein    |
| (107-15 + 107-0) vs (90-15 + 90-0) | Ptrif.0006s0659.1 | Ciclev10012381m | <b>-1.750</b> | 0.005 | 12037889 |     | (1 of 1) PF01809 - Haemolytic domain (Haemolytic)        |
| <b>107-15 vs 90-15</b>             | Ptrif.0006s0659.1 | Ciclev10012381m | <b>-1.094</b> | 0.043 | 12037889 |     | (1 of 1) PF01809 - Haemolytic domain (Haemolytic)        |
| (107-15 + 107-0) vs (90-15 + 90-0) | Ptrif.0006s0678.1 | Ciclev10011334m | 1.491         | 0.088 | 12169108 |     | Pathogenesis-related thaumatin superfamily protein       |
| (107-15 + 107-0) vs (90-15 + 90-0) | Ptrif.0006s0687.1 | Ciclev10013799m | 1.221         | 0.057 | 12217045 |     | Concanavalin A-like lectin protein kinase family protein |
| (107-15 + 107-0) vs (90-15 + 90-0) | Ptrif.0006s0690.1 | Ciclev10011508m | 2.925         | 0.049 | 12242385 |     | Protein of unknown function (DUF604)                     |
| (107-15 + 107-0) vs (90-15 + 90-0) | Ptrif.0006s0695.1 | Ciclev10012433m | <b>-1.787</b> | 0.088 | 12301482 |     |                                                          |
| (107-15 + 107-0) vs (90-15 + 90-0) | Ptrif.0006s0696.2 | Ciclev10013780m | <b>-6.081</b> | 0.017 | 12305174 |     |                                                          |
| <b>107-15 vs 90-15</b>             | Ptrif.0006s0696.2 | Ciclev10013780m | <b>-4.413</b> | 0.067 | 12305174 |     |                                                          |
| (107-15 + 107-0) vs (90-15 + 90-0) | Ptrif.0006s0697.2 | Ciclev10004349m | 1.725         | 0.019 | 12310413 |     | Homeodomain-like superfamily protein                     |
| (107-15 + 107-0) vs (90-15 + 90-0) | Ptrif.0006s2456.1 | Ciclev10012494m | <b>-2.700</b> | 0.029 | 12319292 |     |                                                          |
| (107-15 + 107-0) vs (90-15 + 90-0) | Ptrif.0006s0706.1 | Ciclev10011164m | 1.628         | 0.027 | 12383996 |     |                                                          |
| (107-15 + 107-0) vs (90-15 + 90-0) | Ptrif.0006s0708.1 | Ciclev10013212m | 3.453         | 0.011 | 12405094 |     | (1 of 2) PTHR34670:SF3 - EXPRESSED PROTEIN               |
| (107-15 + 107-0) vs (90-15 + 90-0) | Ptrif.0006s2359.1 | Ciclev10012040m | <b>-1.562</b> | 0.006 | 12444871 |     |                                                          |
| <b>107-0 vs 90-0</b>               | Ptrif.0006s2359.1 | Ciclev10012040m | <b>-1.106</b> | 0.072 | 12444871 |     |                                                          |

|                                    |                   |                 |               |       |          |         |                                                              |
|------------------------------------|-------------------|-----------------|---------------|-------|----------|---------|--------------------------------------------------------------|
| (107-15 + 107-0) vs (90-15 + 90-0) | Ptrif.0006s0715.1 | Ciclev10012242m | 2.169         | 0.007 | 12460159 |         | NAD(P)-linked oxidoreductase superfamily protein             |
| <b>107-15 vs 90-15</b>             | Ptrif.0006s0715.1 | Ciclev10012242m | 1.429         | 0.066 | 12460159 |         | NAD(P)-linked oxidoreductase superfamily protein             |
| (107-15 + 107-0) vs (90-15 + 90-0) | Ptrif.0006s0740.1 | Ciclev10011268m | 0.816         | 0.070 | 12688857 |         | POX (plant homeobox) family protein                          |
| (107-15 + 107-0) vs (90-15 + 90-0) | Ptrif.0006s2462.1 | Ciclev10011341m | <b>-1.353</b> | 0.012 | 12728591 | NPF5.12 | Major facilitator superfamily protein                        |
| (107-15 + 107-0) vs (90-15 + 90-0) | Ptrif.0006s0751.1 | Ciclev10013132m | 4.102         | 0.006 | 12765525 |         | Bifunctional inhibitor/lipid-transfer protein                |
| <b>107-15 vs 90-15</b>             | Ptrif.0006s0751.1 | Ciclev10013132m | 2.448         | 0.066 | 12765525 |         | Bifunctional inhibitor/lipid-transfer protein                |
| (107-15 + 107-0) vs (90-15 + 90-0) | Ptrif.0006s0769.1 | Ciclev10012250m | <b>-1.248</b> | 0.034 | 12880735 |         | Arabidopsis Inositol phosphorylceramide synthase 1           |
| (107-15 + 107-0) vs (90-15 + 90-0) | Ptrif.0006s0774.1 | Ciclev10011384m | 1.427         | 0.065 | 12916342 |         | laccase 7                                                    |
| (107-15 + 107-0) vs (90-15 + 90-0) | Ptrif.0006s0778.2 | Ciclev10011375m | 2.998         | 0.013 | 12956964 |         | laccase 7                                                    |
| (107-15 + 107-0) vs (90-15 + 90-0) | Ptrif.0006s0785.2 | Ciclev10011279m | 2.938         | 0.010 | 12998591 |         | O-fucosyltransferase family protein                          |
| (107-15 + 107-0) vs (90-15 + 90-0) | Ptrif.0006s0790.1 | Ciclev10011563m | <b>-0.675</b> | 0.088 | 13035167 |         | RING/U-box superfamily protein                               |
| (107-15 + 107-0) vs (90-15 + 90-0) | Ptrif.0006s0799.1 | Ciclev10013019m | 5.429         | 0.030 | 13096096 |         |                                                              |
| (107-15 + 107-0) vs (90-15 + 90-0) | Ptrif.0006s0802.1 | Ciclev10013166m | <b>-1.596</b> | 0.098 | 13121317 |         | Protein of unknown function (DUF962)                         |
| (107-15 + 107-0) vs (90-15 + 90-0) | Ptrif.0006s0809.1 | Ciclev10011239m | 1.756         | 0.065 | 13234551 |         | Protein of unknown function (DUF740)                         |
| (107-15 + 107-0) vs (90-15 + 90-0) | Ptrif.0006s0814.5 | Ciclev10011381m | 2.037         | 0.007 | 13277480 | NPF8.1  | peptide transporter 1                                        |
| (107-15 + 107-0) vs (90-15 + 90-0) | Ptrif.0006s0815.1 | Ciclev10013821m | 6.161         | 0.086 | 13284465 | NPF8.2  |                                                              |
| (107-15 + 107-0) vs (90-15 + 90-0) | Ptrif.0006s0816.1 | Ciclev10011400m | 3.413         | 0.079 | 13290531 |         | Laccase/Diphenol oxidase family protein                      |
| (107-15 + 107-0) vs (90-15 + 90-0) | Ptrif.0006s0817.1 | Ciclev10012285m | 1.799         | 0.010 | 13300960 |         | Duplicated homeodomain-like superfamily protein              |
| (107-15 + 107-0) vs (90-15 + 90-0) | Ptrif.0006s0823.1 | Ciclev10013337m | 6.937         | 0.006 | 13354423 | NPF5.9  | proton-dependent oligopeptide transport (POT) family protein |
| <b>107-15 vs 90-15</b>             | Ptrif.0006s0823.1 | Ciclev10013337m | 3.530         | 0.078 | 13354423 | NPF5.9  | proton-dependent oligopeptide transport (POT) family protein |
| (107-15 + 107-0) vs (90-15 + 90-0) | Ptrif.0006s0827.1 | Ciclev10011536m | 2.125         | 0.052 | 13385377 |         | glycerol-3-phosphate acyltransferase 6                       |
| (107-15 + 107-0) vs (90-15 + 90-0) | Ptrif.0006s0838.2 | Ciclev10013652m | <b>-1.669</b> | 0.014 | 13506477 |         |                                                              |
| (107-15 + 107-0) vs (90-15 + 90-0) | Ptrif.0006s0841.2 | Ciclev10013439m | <b>-3.980</b> | 0.010 | 13552749 |         |                                                              |
| (107-15 + 107-0) vs (90-15 + 90-0) | Ptrif.0006s0848.4 | Ciclev10011409m | <b>-1.048</b> | 0.040 | 13610864 |         | Carbohydrate-binding-like fold                               |
| (107-15 + 107-0) vs (90-15 + 90-0) | Ptrif.0006s0854.1 | Ciclev10012370m | 2.539         | 0.017 | 13655960 |         | light harvesting complex photosystem II                      |
| (107-15 + 107-0) vs (90-15 + 90-0) | Ptrif.0006s0866.1 | Ciclev10012918m | <b>-2.477</b> | 0.006 | 13765578 |         |                                                              |
| (107-15 + 107-0) vs (90-15 + 90-0) | Ptrif.0006s0901.1 | Ciclev10011366m | 1.107         | 0.030 | 14033606 |         | DNAJ heat shock N-terminal domain-containing protein         |
| (107-15 + 107-0) vs (90-15 + 90-0) | Ptrif.0006s0902.2 | Ciclev10011094m | 1.866         | 0.058 | 14040413 |         | Pentatricopeptide repeat (PPR) superfamily protein           |

|                                    |                   |                 |        |       |          |                                                                   |
|------------------------------------|-------------------|-----------------|--------|-------|----------|-------------------------------------------------------------------|
| (107-15 + 107-0) vs (90-15 + 90-0) | Ptrif.0006s2379.1 | Ciclev10014534m | 0.938  | 0.088 | 14050230 |                                                                   |
| (107-15 + 107-0) vs (90-15 + 90-0) | Ptrif.0006s0918.2 | Ciclev10011595m | 1.046  | 0.098 | 14141796 | ammonium transporter 2                                            |
| (107-15 + 107-0) vs (90-15 + 90-0) | Ptrif.0006s0923.2 | Ciclev10010996m | 0.811  | 0.092 | 14177509 | tetratricopeptide repeat (TPR)-containing protein                 |
| (107-15 + 107-0) vs (90-15 + 90-0) | Ptrif.0006s0932.1 | Ciclev10013559m | 5.945  | 0.031 | 14231262 |                                                                   |
| (107-15 + 107-0) vs (90-15 + 90-0) | Ptrif.0006s2383.1 | Ciclev10011480m | -0.813 | 0.029 | 14249683 | (1 of 4) PF14237 - Domain of unknown function (DUF4339) (DUF4339) |
| (107-15 + 107-0) vs (90-15 + 90-0) | Ptrif.0006s0939.1 | Ciclev10012499m | -0.864 | 0.022 | 14254882 | Ribosomal protein S4 (RPS4A) family protein                       |
| (107-15 + 107-0) vs (90-15 + 90-0) | Ptrif.0006s0947.1 | Ciclev10013878m | -1.071 | 0.055 | 14296840 | TRICHOME BIREFRINGENCE-LIKE 35                                    |
| (107-15 + 107-0) vs (90-15 + 90-0) | Ptrif.0006s0968.1 | Ciclev10011564m | -2.393 | 0.022 | 14447210 | iron regulated 1                                                  |
| (107-15 + 107-0) vs (90-15 + 90-0) | Ptrif.0006s0973.1 | Ciclev10012298m | 2.233  | 0.035 | 14482241 | NAD(P)-binding Rossmann-fold superfamily protein                  |
| (107-15 + 107-0) vs (90-15 + 90-0) | Ptrif.0006s0982.1 | Ciclev10012456m | -2.060 | 0.015 | 14529686 | Protein of unknown function (DUF567)                              |
| (107-15 + 107-0) vs (90-15 + 90-0) | Ptrif.0006s2386.1 | Ciclev10012606m | -1.297 | 0.086 | 14639604 |                                                                   |
| (107-15 + 107-0) vs (90-15 + 90-0) | Ptrif.0006s0996.1 | Ciclev10026054m | 3.022  | 0.012 | 14670806 |                                                                   |
| (107-15 + 107-0) vs (90-15 + 90-0) | Ptrif.0006s1003.1 | Ciclev10011350m | 3.270  | 0.052 | 14719145 |                                                                   |
| (107-15 + 107-0) vs (90-15 + 90-0) | Ptrif.0006s1004.2 | Ciclev10011771m | -1.476 | 0.006 | 14734192 | serine/threonine protein kinase 1                                 |
| (107-15 + 107-0) vs (90-15 + 90-0) | Ptrif.0006s1005.1 | Ciclev10011217m | 1.848  | 0.023 | 14749634 | ARM repeat superfamily protein                                    |
| (107-15 + 107-0) vs (90-15 + 90-0) | Ptrif.0006s1008.1 | Ciclev10012094m | 3.546  | 0.070 | 14765782 | 2-oxoglutarate (2OG) and Fe(II)-dependent oxygenase protein       |
| (107-15 + 107-0) vs (90-15 + 90-0) | Ptrif.0006s1017.2 | Ciclev10013804m | 3.202  | 0.012 | 14822836 |                                                                   |
| (107-15 + 107-0) vs (90-15 + 90-0) | Ptrif.0006s1035.2 | Ciclev10010994m | 1.881  | 0.052 | 14933272 | Leucine-rich receptor-like protein kinase family protein          |

**Table S9.** Primer sequences for mapping candidate genes and genetic positions of the corresponding SCAR markers.

| Gene           | Forward Primer       | Reverse Primer           | Genetic Position 4c (cM) | Genetic Position R4c (cM) |
|----------------|----------------------|--------------------------|--------------------------|---------------------------|
| <i>PIP2.1</i>  | CGGTAAGCWGCARGGAATCA | KCCCAAATGAGTGTCCACAA     | 62.906                   | 29.325                    |
| <i>ABCG</i>    | CTTAGGGGCGACATGTTTGG | AAGAAGAGAAGCAAGCAAATGAA  | 33.8                     | 19.775                    |
| <i>MSF</i>     | GGAGCTATTGCTCAGGTGGT | TCCTGTTCCCAAGCAATC       | 17.437                   | 14.458                    |
| <i>NPF5.12</i> | CACGCACCAATATCCAAAGA | TTTCGATGCCATCAATTCTG     | 11.102                   | 8.344                     |
| <i>NPF8.1</i>  | CTTAGGGGCGACATGTTTGG | AAGAAGAGAAGCAAGCAAATGAA  | 10.007                   | .                         |
| <i>NPF5.9</i>  | GGCTCAAATTAAGCGTGTC  | TATTACCGAACAAGACGCTTAGGC | 3.234                    | 3.177                     |

**Table S10.** Sequences of SCAR markers. Comparisons with *C. clementina* orthologous genes using <https://phytozome-next.jgi.doe.gov/blast-search>.

-MSF from Flying Dragon (Ciclev10011745m.g: E-value=0; % identity= 98; Alignment length= 501)

GCAATGTGAGCTTGAATGTATTAATATTTTTCCATCTCCTTGATTCACTGTCTTCC-  
TATAGGGTAACTAGTGGAGTACTTGGCACTCTATCCACTTATCATGGCAGCTTTGTTGGGCATTGGTGATGGAGTGCTCAATACACAGCTTAGTGCTTTGCTTGGGATACTCTTTA  
AGCACGATACGGTAACAGCTAATCCTACTTTAATAAGACAAATATTTGTTTGGTAGGTGAC-  
TATGAAATTTCTTTTAGTCAGTCAGTCTACCTCATATTCTTCAGGAACACCCAAGGATACAATGGCAATGATGAACTAGTCATATCAGCAATATTCTGCATCAAACCTTGCTTATTTT  
ATTTTACCTGGCAAATCATATTC-  
TATTAGGTTTCATATTTTTCCATATCTAATCATAAAGGAAAAGAAAATGTAAAAAATGAAAATTCCACCTACTGTATTAGATGGTTGCTTTGTATATAGGTCTAGAATTCTTGCAAGA  
TGGAGAG

-MSF from 22-7 (Ciclev10011745m.g: E-value=0; % identity= 99; Alignment length= 790)

GAGAGATTACAAATTAATAAAAAGAAAACAATGACCTAATTTAGGCTTCTTTTACT-  
AATCAGCATAAAAAGAATCATGTATAAACTTATCCGTAATCTGTTAAATGAGGACGCCAACCATAGTAGCTAATTGGCTAATTTATAACACAAAAGAAAAGTCTCTCCTCCATCTTGC  
AAGAATTCTAGACCTATATACAAAGCAACCATCTAATACAGTACGTG-  
GAATTTTCATTTTTTACATTTTCTTTTCTTTTATGATTGGATATGGAAAAATATGAACCTAATAGAATATGATTTGCCAGGTAAAATAAAAATAAGCAAGTTTGATGCAGAATATTGCT  
GATATGACTAGTTTCATCATTGCCATCGTATCCTTGGGTGTTCTGAAGAT-  
TATGAGGTAGACTGACTGACTAAAAGGAAATTCATATTCATAGTCACCTACCAAACAAGTATTTGTCTTATTAAAGTTGGATTAGCTGTTACCGTATCGTGCTTAAAGAGTATCCCAA

GCAAAGCACTAAGCTGTGTATTGAGCACTCCATCACCAATGCCAACAAAGCTGCCATGA-  
TAAGTGGATATAGAGTGCCAAGTACTCCACTAGTTACCCTATAGGAAGACAGTGAATCAAGGAGATGGAAAAATTAATACATTCAAGCTCACACTACTACAAAACAACCTTCAA  
GTTCTGAAAACCTTCAATGTAACAGGAGTACACAACACAGTGTAAACAGGAGTACACAACACTAACCTGTAATTTATCAGAATCCAGAGAAATACAACCAC

-NPF5.9 from 22-7 (Ciclev10013337m.g: E-value=0; % identity= 99; Alignment length= 631)

GTGCAGTGTTACCGAAGTTGAAGAAACAAAATGTCTTGTACATTTGATTCCAATTT-  
GTTTCACTTTTCATCATACCAGGAGTAGTTTCTCAATTGGAAACACTTTCTTTCTTGAGCAAGCAGAAGTTATAAACGGAAAAGATGGAGGAAATTTTAGTTTCGGTCCTCTATTGCT  
CCTACTGTTGTATTACATCTCGAAAGACCGTTTACGGCCTTCTACGAAGGATTTGTT-  
GGACATCTCACTTCAGTAGGATGGAACGCCGTAGCTCATGTGCTGGATTTGCAATGTCAATGATTCTATCAATACTATGCTGTGTAACAGCAGCAATAGTCGAGACTCGGAGGTT  
GGATGTTGTTAGAAGCCATGGTTTAATTGACAAGCCTGATGAAAAAATCCCCATGAGCTT-  
GTTTTGGCTGCTGCCACAGTTTCTACTTCTCGGAGCCGCTGATGGGTTCTATGAAAAAGGCATTGATATGTTCTTCAGCGATCAGTTTCTCGCATGATTTTCAGATATCTGAAGTAC  
ATTTTACTATGGGAGTAGGAATTATTGGCAGTACCCTGTCCGTTTACTATGCGGGAATCATCAGTGAAAGGATCGGGAAACATAATTGGTTTCAGGAC

-NPF5.9 from Flying Dragon (Ciclev10013337m.g: E-value=0; % identity= 99; Alignment length= 629)

GACGATTCCGGCATAGTAAACGGACAGGGTACTGCCAATAATTCCTACTCCCATAGTAG-  
CAACAAAAATGTACTTCAGATATCTGAAAATCATGCGAGGAAATTGATCGCTGAAGAACATATCAATGCCTTTTTTCATAGAACCCATCAGCGGCTCCGAGAAGTAGAAACTGTGGC  
AGCAGCCAAAACATGCTCATGGGGATTTTTTCATCAGGCTTGTC AATTAAC-  
CATGGCTTCTAACAACATCCAACCTCCGAGTCTCGACTATTGCTGCTGTTACACAGCATAGTATTGATAGAATCATTGACATTGCAAATCCAACGACATGAGCTACGGCGTTCCATCC  
TACTGAAGTGAGATGTCCAACAAATCCTTCGTAGAAGGCCGTGAAACGGTCTTTTCTGA-  
GATGTAATAGAGCAGTAGGAGCAATAGAGGACCGAACTAAAATTTCTCCATCTTTTCCGTTTATAACTTCTGCTTGCTCAAGAAAGAAAGTGTTC AATTGAGGAAACTACTCC  
TGGTATGATGAAAGTGAAACAAATTGGAATCAAATGTACAAGACATTTTGTTCCTCAACTTCGGTAACACTGCACAATCTCCATCTGTTTCTTTCTTGTTCCTAAGCG

- NPF5.9 from 90, allele c (Ciclev10013337m.g: E-value= 6.47e-92; % identity= 98; Alignment length= 199)



ATCCTTCCTGACGATTCCGGCATAGTAAACGGACAGGGTACTGCCAATAATTCC-  
TACTCCCATAGTAGCAACAAAAATGACTTCAGATATCTGAAAATCATGCGAGGAAATTGATCGCTGAAGAACATATCAATGCCTTTTTTCATAGAACCCATCAGCGGCTCCGAGAAG  
TAGAAACTGTGGCAGCAGCCAAAACATG

- NPF5.9 from Cleopatra, allele b (Ciclev10013337m.g: E-value= 1.36e-100; % identity= 100; Alignment length= 203)

CGCTGATGGTTCTATGAAAAAGGCATTGATATGTTCTTCAGCGATCAGTTTCCTCG-  
CATGATTTTCAGATATCTGAAGTACATTTTTGTTGCTACTATGGGAGTAGGAATTATTGGCAGTACCCTGTCCGTTTACTATGCGGGAATCATCAGTCAAAGGATCGGGAAACATAA  
TTGGTTTCAGGACACGCTTAATTTGAGCC

-ABCG from 22-7 (Ciclev10013485m.g: E-value=2.31e-101; % identity= 100; Alignment length= 205)

GTTAACAGTATGGACTACTTCAAAGATATTAATAAAAAATTCAAAAAAGGAATGTG-  
GACATGATTTCTTTTGCTATTATAAGATTCGTTTTAAAAGTTAAATTCAAAGCCCACCAAGTTATATATGCATTGCATTTCCATTCCGAATTTGGATCCAAACATATTAGCATTGTCATT  
ATGGAGGCACCAAACATGTGCCCCCTAAGGACCTTCTTAGAAATATCGGCTCCCACATCCG-  
CATCCTCAAGAGCCTTCTTGCCAAAAACAATGCTGAACCTCAAACAATCATCAATTCTGCGATCATTCTTGCCATCAATATAACCCTCTGCACTAATCCCCGGATCTGGTCGCCGAA  
GCGGGTCGGGAACCTACTAGCATCGAACCGGTCAATC

-NPF5.12 from 22-7 (Ciclev10011341m.g: E-value=0; % identity= 96; Alignment length= 453)

GATGCTAGCTCCTCTGCGCATGGATAGCTATCTCTCACGTATA-  
GAATTAATCCTTTTTCTTTTTCTTTTTCTTTTTTACCTTCTTTTTCTTCTTTTCTTAATTCTTTCAAGACAAGATTATATATATATAGACACAAACACACACACACAATTTAATTA  
TTTGAATTTTAAACTAG-  
TGATCCTCATATTCTCAAGTAACATCATGCCTCAAAAAAAAAATCATAAATGTGCCATTCTATTATCTTGGGAGTCCTTCAAGATGTCTGTATTTTTATAAAGTTTAAACTCACACCA  
CTATATAGCAGTATAAAAGTCTTTACAACATTATAAATTAATAA-  
GCATGTAAAAAATCCTTCATTATACTGTAAAGGTGCCAGTTTACAACCTTATAAAGTGTGAATGTCTGCACCAGATAATAACTATATCTTTG

-NPF5.12 from Fd (Ciclev10011341m.g: E-value=1.84e-140; % identity= 83; Alignment length= 447)

ACTTTACAAGTTGTAAACTCTCACCTTTACAG-

TATAATGAAGGATCTTTTACATGCTTTTAATTTATAATGTTGTAAAGACTTTTATCCTGCTATATAGTGGTGTGAGTTTAACTTTATAAAAATACAGACATCTTGAAGGACTCCCAAG

ATAATAGGAATGGCACATTTATGATGTTACTTGAGTATATGAGGATCACTAGTTTAAAGAT-

TCAAATAATTAATTGTGTGTGTGTCTATATATATAATCTTGTCTTGAAGAGAATTAAGAAAAGGATGGAAAAAGAAAAAGAAAAAGGATTAATTCTATACGTGAGACATAGC

TATCCATGCGCAGAGGAGCTAGCATTGAGAAAAACGAAGAGAAGCAGCAGAATT

- PIP2.1 from Fd [genomic sequence near Ciclev10012375m.g (scaffold\_6:10422129..10422358), at scaffold\_6:10422321..10422400: E-value= 1.07e-32; % identity= 99; Alignment length= 80)

TGATCAGGGAATGCATTGCCAAATTATTGTAATGTTAAGAAAAGAAAGTGCCCCGTCCCATTTGTGGACACTCATTGGGC

- PIP2.1 from 90, allele b, [genomic sequence near Ciclev10012375m.g (scaffold\_6:10419232..10420904), at scaffold\_6:10422321..10422400: E-value= 2.02e-89; % identity= 96; Alignment length= 210)

GAGTTGCTGGAAGCGTGCAAGTACGGGTTTGCCGGGTAAGATTGATTTGAAATACGAAAA-

TATTTGGAAGTGGATTTAAGTATCAGGGAATGCATTGCCAAATTATTGTAATGTTAAGAAAAGAAAGTGCCCCGTCCCATTTGTGGACACTCATTGGGCCATTGTGGACACGCC

GTTTGGGAATAATTTGGCAATGCATCCCTGATCACTTAAATCCACTTCCAAATATATTCG-

TATTTCAAATCAATCTTACCCGGCAAACCCGTACTTGACGCTTCCGCAACTTGTTTTCAACCACTACCTGCATAGTTGCGTGCCTCAATACATGCGTTGTTTCACTACTTGCATAGTT

GCATGCACTCAGTACATGCATTGTTTTGTCAAAAA

- PIP2.1 from 90, allele c, [genomic sequence near Ciclev10012375m.g (scaffold\_6:10419232..10420904), at scaffold\_6:10422219..10422409: E-value= 6.40e-70; % identity= 95; Alignment length= 173)

AGTGGTAGAAAACAAGTTGCTGGAAGCGTGCAATTACGGGTTGGGGTAAGATTGATTTGAAA-

TACGAAAATATTTGGAAGTGGATTTAAGTATCAGGGAATGCATTGCTAAATTATTGTAATGTTAAGAAAAGAAAGTGCCCCGTCCCATTTGTGGACATCATTGGGCATTTGGGC

ATTTCTTAACATTAATAATTTAGCATGCATTCCCTGATCACTTAAATCCACTTCCAAA-

TATTTTCGTATTTCAAATCAATCTTACCCCAACCCGTAATTGCACGCTTCCGCAACTTGTTTTCTACCACTACTTGCATAGTTGCATGCACTCAGTTCAAGCGTTGTTTTGTCAAAAAGCT

- PIP2.1 from 107, allele a, [genomic sequence near Ciclev10012375m.g (scaffold\_6:10419232..10420904), at scaffold\_6:10422160..10422411: E-value= 3.87e-112; % identity= 99; Alignment length= 230)

```
TGCTGCAACTATGCAAGTAGTGAAACAACGCATGTAATGAGTGACGCAACTATGCAAGTAG-
TGGTTGAAAACAAGTTGCTGGAAGCGTGCAAGTACGGGTTTGACGGGTAAGATTGATTTGAAATACGAAAATATTTGGAAGTGGATTAAAGTGATCAGGGAATGCATTGCCGAAT
TATTGTAATGTTAAGAAAAGAAAGTGCCCCGTCCCATTTGTGGACATCCATTTGGGCCAAC-
GTTCACTGGTTTGGGCAATAATTCGGCAATGCATTCCCTGATCACTTAAATCCACTTCAAATATTTTCGTATTTCAAATCAATCTTACCCGTCAAACCCGTACTTGCACGCTTCCA
GCAACTTGTTTTCAACCACTACTTGCATAGTTGCGTGCCTCAATACATGCGTTGTTTCACTACTTGCATAGTTGCAAGCACTAAGTACATGCGTTGTTTGTCAAAAAG
```

- PIP2.1 from 107, allele c, [genomic sequence near Ciclev10012375m.g (scaffold\_6:10419232..10420904), at scaffold\_6:10422125..10422386: E-value= 2.81e-67; % identity= 92; Alignment length= 185)

```
ATTGATTTGAAATACGAAAATATTTGGAAGTGGATTAAAGTGATCAGGGAATGCATT-
GCTAAATTATTGTAATGTTAAGAAAAGAAAGTGCCCCGTCCCATTTGTGGACCTCATTTGGGCCACTTTCATTTCTTAACATTAATAATTTAGCAATGCATTCCCTGATCACTTAAAT
CCACTTCAAATATTTTCGTATTTCAAATCAATCTTACCCCAACCCGTAATTGCAC-
GCTTCCGCAACTTGTTTTCTACCACTACTTGCATAGTTGCATGCACTCAGTTCATGCGTTGTTTGTCAAAAAGT
```

- NPF8.1 from 22-7 (Ciclev10011381m.g: E-value= 1.98e-78; % identity= 99; Alignment length= 169)

```
TTTAAACCAATATAGCAAATATCGATACTCTAGATTAATAATTTGATATTTAAACTA-
TATGTACAAAGCATTTTCTTTTATCAATCACAAAAAACTGAAACTCCGAAAGAAAACACACACATTGATCCACCTACCATTCTTCTATCAATTTGCACGTCCAGTAGCC
```

- NPF8.1 from Cleopatra (Ciclev10011381m.g: E-value= 4.14e-74; % identity= 99; Alignment length= 159)

```
CATGTGTGTTTTCTTTTCGGAGTTTCAGTTTTTTTTGTGATTGATAAAAAGAAAATGCTTT-
GTACATATAGTTTTAAATATCAAATTTTAAATCTAGAGTATCGATATTTGCTATATTGGTTTAAATTTTGGGGTTCGATTTATGCTTGCAGTTCCCGTTTG
```
